# Supplementary material for: Exploration of Nonlinear Optical Properties for the First Theoretical Framework of Non-Fullerene DTS(FBTTh2)2-Based Derivatives
Source: PubMed Central journal article supplement — ACS Omega. 2022 May 18;7(21):18027–40. doi: 10.1021/acsomega.2c01474 (PMC9161415; doi:10.1021/acsomega.2c01474), 2022-05-18
Supplement: ao2c01474_si_001.pdf [file ao2c01474_si_001.pdf]

## Supplementary Information

### Exploration of Nonlinear Optical Properties for First Theoretical Framework of Non-Fullerene DTS(FBTTh<sub>2</sub>)<sub>2</sub> Based Derivatives

Muhammad Usman Khan,<sup>\*1</sup> Shabbir Hussain,<sup>2</sup> Muhammad Adnan Asghar,<sup>3</sup> Khurram Shahzad Munawar,<sup>4</sup> Rasheed Ahmad Khera,<sup>5</sup> Muhammad Imran<sup>6</sup>, Mohamed M. Ibrahim,<sup>7</sup> Mahmoud M. Hessien,<sup>7</sup> Gaber A. M. Mersal,<sup>7</sup>

<sup>1</sup>Department of Chemistry, University of Okara, Okara-56300, Pakistan

<sup>2</sup>Department of Chemistry, Khwaja Fareed University of Engineering & Information Technology, Rahim Yar Khan, 64200, Pakistan

<sup>3</sup>Department of Chemistry, Division of Science and Technology, University of Education Lahore, Pakistan

<sup>4</sup>Department of Chemistry, University of Mianwali, Punjab, Pakistan

<sup>4</sup>Department of Chemistry, University of Agriculture, 38000, Faisalabad, Pakistan

<sup>6</sup>Department of Chemistry, Faculty of Science, King Khalid University, P.O. Box 9004, Abha 61413, Saudi Arabia.

<sup>7</sup>Department of Chemistry, College of Science, Taif University, P.O. Box 11099, Taif 21944, Saudi Arabia.

**\* Corresponding author E-mail address:**

Dr. Muhammad Usman Khan ([usman.chemistry@gmail.com](mailto:usman.chemistry@gmail.com))

**Table S1:** Cartesian coordinates of DTS(FBTTh<sub>2</sub>)<sub>2</sub>R1

| Atom | X-axis   | Y-axis   | Z-axis   |
|------|----------|----------|----------|
| C    | -3.19877 | 0.798845 | 0.014766 |
| C    | -2.74975 | 2.110493 | 0.010289 |
| C    | -1.34948 | 2.243835 | 0.004107 |
| C    | -0.72095 | 1.005319 | 0.0027   |
| C    | 1.349461 | 2.243858 | -0.00384 |
| C    | 0.720955 | 1.005331 | -0.00251 |
| C    | 2.749738 | 2.11054  | -0.01005 |
| C    | 3.198777 | 0.798899 | -0.01461 |
| S    | 1.827616 | -0.3152  | -0.01092 |
| S    | -1.82759 | -0.31523 | 0.010994 |

---

|    |             |          |          |
|----|-------------|----------|----------|
| C  | 4.933958    | -1.00617 | -0.04797 |
| C  | 4.567131    | 0.32695  | -0.02221 |
| C  | 5.705731    | 1.209645 | -0.00332 |
| C  | 7.067046    | 0.705743 | -0.0151  |
| C  | 7.3584      | -0.69871 | -0.04658 |
| C  | 6.243887    | -1.5114  | -0.05904 |
| H  | 6.332095    | -2.5937  | -0.07771 |
| H  | 3.447798    | 2.939688 | -0.01093 |
| N  | 7.986067    | 1.666618 | 0.007203 |
| N  | 5.654231    | 2.540126 | 0.027986 |
| C  | 9.051692    | -2.57258 | -0.12313 |
| C  | 8.701764    | -1.23847 | -0.06359 |
| C  | 11.17725    | -1.64091 | -0.07064 |
| C  | 10.43735    | -2.80121 | -0.12739 |
| H  | 8.320352    | -3.37364 | -0.17373 |
| H  | 10.88788    | -3.78798 | -0.18981 |
| S  | 10.1415     | -0.24278 | 0.000212 |
| C  | 12.61064    | -1.49131 | -0.06381 |
| C  | 13.36524    | -0.35982 | -0.24791 |
| C  | 14.76033    | -0.59719 | -0.17746 |
| C  | 15.08468    | -1.90357 | 0.057645 |
| H  | 12.92498    | 0.614092 | -0.44434 |
| H  | 15.51507    | 0.174456 | -0.30321 |
| S  | 13.64746    | -2.87487 | 0.208487 |
| C  | -6.2439     | -1.51144 | 0.059003 |
| C  | -7.3584     | -0.69874 | 0.046582 |
| C  | -7.06703    | 0.705708 | 0.01519  |
| C  | -5.70571    | 1.209595 | 0.003466 |
| C  | -4.56712    | 0.326889 | 0.022322 |
| C  | -4.93396    | -1.00623 | 0.047986 |
| H  | -6.33212    | -2.59375 | 0.077586 |
| Si | -0.00002000 | 3.560186 | 0.000174 |
| C  | -0.00382    | 4.623334 | -1.54352 |
| H  | -0.00522    | 4.002392 | -2.44492 |
| H  | -0.88997    | 5.267232 | -1.57211 |
| H  | 0.881336    | 5.268444 | -1.57565 |
| C  | 0.003763    | 4.623252 | 1.543929 |
| H  | 0.005176    | 4.002265 | 2.445296 |
| H  | 0.889906    | 5.267164 | 1.572548 |
| H  | -0.8814     | 5.268346 | 1.576088 |
| S  | 7.189942    | 3.087482 | 0.040751 |
| H  | -3.44783    | 2.939629 | 0.011223 |
| S  | -7.18989    | 3.087452 | -0.04051 |

---

|   |          |          |          |
|---|----------|----------|----------|
| N | -5.65419 | 2.540076 | -0.02776 |
| N | -7.98604 | 1.666596 | -0.00707 |
| C | -10.4374 | -2.80121 | 0.127257 |
| C | -11.1773 | -1.64091 | 0.070474 |
| C | -8.70177 | -1.23849 | 0.063532 |
| C | -9.05171 | -2.5726  | 0.123065 |
| H | -10.8879 | -3.78798 | 0.18967  |
| H | -8.32038 | -3.37366 | 0.173712 |
| S | -10.1415 | -0.24279 | -0.00034 |
| C | -15.0847 | -1.90353 | -0.05799 |
| C | -14.7603 | -0.59716 | 0.17714  |
| C | -13.3652 | -0.3598  | 0.247656 |
| C | -12.6106 | -1.49129 | 0.063575 |
| H | -15.5151 | 0.174501 | 0.302864 |
| H | -12.925  | 0.61411  | 0.444113 |
| S | -13.6475 | -2.87484 | -0.20878 |
| C | -16.4357 | -2.51399 | -0.18917 |
| H | -17.2031 | -1.74339 | -0.06467 |
| H | -16.5837 | -2.97842 | -1.17162 |
| H | -16.6123 | -3.28781 | 0.567527 |
| C | 16.43573 | -2.51405 | 0.188759 |
| H | 17.20312 | -1.74346 | 0.064251 |
| H | 16.58369 | -2.97851 | 1.171184 |
| H | 16.61226 | -3.28785 | -0.56797 |
| F | 3.973719 | -1.94169 | -0.06414 |
| F | -3.97373 | -1.94176 | 0.064107 |

**Table S2:** Cartesian coordinates of **MSTD2**

| Atom | X-axis   | Y-axis   | Z-axis   |
|------|----------|----------|----------|
| C    | -2.32592 | 2.05253  | 0.016087 |
| C    | -1.8385  | 3.350738 | 0.048113 |
| C    | -0.43529 | 3.444276 | -0.00676 |
| C    | 0.155487 | 2.191142 | -0.08327 |
| C    | 2.26525  | 3.370941 | -0.12567 |
| C    | 1.594939 | 2.155298 | -0.14956 |
| C    | 3.661448 | 3.185234 | -0.20379 |
| C    | 4.058061 | 1.866326 | -0.28699 |
| S    | 2.662146 | 0.800982 | -0.26223 |
| S    | -0.98721 | 0.90277  | -0.08516 |
| C    | 5.653689 | 0.035031 | -0.86733 |
| C    | 5.405191 | 1.330525 | -0.38743 |
| C    | 6.513051 | 2.102321 | -0.00201 |

---

|    |            |          |          |
|----|------------|----------|----------|
| C  | 7.800325   | 1.61033  | -0.10881 |
| C  | 8.045254   | 0.316096 | -0.58874 |
| C  | 6.939814   | -0.46302 | -0.9579  |
| H  | 7.093624   | -1.48171 | -1.30725 |
| H  | 4.381174   | 4.00013  | -0.22965 |
| C  | 9.84104    | -1.24394 | -1.50849 |
| C  | 9.393157   | -0.22019 | -0.70602 |
| C  | 11.84513   | -0.7022  | -0.4524  |
| C  | 11.21644   | -1.5159  | -1.36596 |
| H  | 9.193165   | -1.76944 | -2.20328 |
| H  | 11.73673   | -2.29333 | -1.91965 |
| S  | 10.70624   | 0.420401 | 0.249434 |
| C  | 13.22684   | -0.68887 | -0.05208 |
| C  | 13.8221    | -0.00262 | 0.982998 |
| C  | 15.20914   | -0.23152 | 1.082043 |
| C  | 15.69845   | -1.09443 | 0.131359 |
| H  | 13.26278   | 0.630128 | 1.666137 |
| H  | 15.82946   | 0.197885 | 1.864076 |
| S  | 14.4129    | -1.62343 | -0.92682 |
| C  | -5.43096   | -0.17541 | 0.066451 |
| C  | -6.52578   | 0.671861 | 0.110489 |
| C  | -6.19084   | 2.069657 | 0.122425 |
| C  | -4.81592   | 2.535185 | 0.094714 |
| C  | -3.70663   | 1.61931  | 0.050054 |
| C  | -4.11315   | 0.294396 | 0.039378 |
| H  | -5.55035   | -1.25443 | 0.048434 |
| Si | 0.94903800 | 4.718776 | -0.01569 |
| C  | 0.921778   | 5.840231 | -1.51675 |
| H  | 0.872149   | 5.253846 | -2.43968 |
| H  | 0.051059   | 6.504838 | -1.49003 |
| H  | 1.820319   | 6.466195 | -1.55743 |
| C  | 1.050995   | 5.719534 | 1.565487 |
| H  | 1.078305   | 5.062842 | 2.440794 |
| H  | 1.950395   | 6.345428 | 1.579125 |
| H  | 0.181992   | 6.379579 | 1.664081 |
| H  | -2.5131    | 4.196844 | 0.108191 |
| S  | -6.24835   | 4.454514 | 0.157994 |
| N  | -4.72629   | 3.864607 | 0.112114 |
| N  | -7.08139   | 3.054407 | 0.158449 |
| C  | -9.64469   | -1.34857 | 0.181125 |
| C  | -10.3637   | -0.15978 | 0.178107 |
| C  | -7.87558   | 0.17948  | 0.139735 |
| C  | -8.26503   | -1.15363 | 0.160573 |

---

---

|   |          |          |          |
|---|----------|----------|----------|
| H | -10.1209 | -2.32428 | 0.213599 |
| H | -7.55452 | -1.97476 | 0.16895  |
| S | -9.28856 | 1.216277 | 0.146855 |
| C | -14.2628 | -0.34104 | 0.205801 |
| C | -13.8803 | 1.003167 | 0.297097 |
| C | -12.504  | 1.194039 | 0.293669 |
| C | -11.7751 | 0.013261 | 0.196663 |
| H | -14.6236 | 1.789347 | 0.351769 |
| H | -12.0299 | 2.168953 | 0.372245 |
| S | -12.843  | -1.36115 | 0.106826 |
| F | -3.17672 | -0.66484 | -0.00344 |
| C | 17.06707 | -1.55492 | -0.04967 |
| C | 18.13062 | -0.78095 | 0.445531 |
| C | 17.35115 | -2.76299 | -0.71161 |
| C | 19.41246 | -1.26744 | 0.274403 |
| H | 17.93882 | 0.177036 | 0.922995 |
| C | 18.65479 | -3.2162  | -0.89327 |
| H | 16.52501 | -3.37021 | -1.07486 |
| H | 18.8379  | -4.15299 | -1.41437 |
| C | 19.70311 | -2.47224 | -0.38194 |
| C | -17.8682 | -0.7634  | -0.56797 |
| C | -17.5037 | -2.10289 | -0.40743 |
| C | -18.4699 | -3.08844 | -0.5701  |
| C | -19.7655 | -2.69896 | -0.91848 |
| C | -20.1088 | -1.36041 | -1.08982 |
| C | -19.1474 | -0.3681  | -0.90183 |
| C | -15.5905 | -0.82495 | 0.080187 |
| H | -18.2425 | -4.14308 | -0.45666 |
| H | -20.5226 | -3.46692 | -1.06028 |
| H | -21.1272 | -1.09348 | -1.36191 |
| H | -19.3747 | 0.691174 | -0.99941 |
| C | -16.6997 | 0.096991 | -0.27609 |
| O | -16.6899 | 1.314921 | -0.34327 |
| C | -16.0838 | -2.14504 | 0.055438 |
| C | -15.4455 | -3.31223 | 0.494748 |
| N | -15.805  | -4.59464 | -0.03505 |
| O | -15.8127 | -5.57309 | 0.699341 |
| O | -16.1289 | -4.62079 | -1.22481 |
| N | -14.4968 | -3.33522 | 1.569404 |
| O | -13.6703 | -4.23929 | 1.605073 |
| O | -14.5408 | -2.41019 | 2.378824 |
| H | 4.82052  | -0.59121 | -1.18141 |
| C | 21.65764 | -1.43331 | 0.32708  |

---

|   |          |          |          |
|---|----------|----------|----------|
| C | 21.19277 | -2.6218  | -0.4374  |
| C | 21.97976 | -3.7309  | 0.29062  |
| H | 22.05217 | -4.65848 | -0.28527 |
| C | 23.00824 | -1.59509 | 0.917558 |
| C | 23.34023 | -3.0574  | 0.530167 |
| H | 23.9419  | -3.56222 | 1.290519 |
| N | 20.62517 | -0.679   | 0.704663 |
| C | 20.67984 | 0.497626 | 1.545534 |
| H | 20.24819 | 1.355367 | 1.018356 |
| H | 20.11362 | 0.328117 | 2.467916 |
| H | 21.71933 | 0.722604 | 1.790843 |
| H | 23.7565  | -0.87896 | 0.549568 |
| H | 22.96364 | -1.46162 | 2.010377 |
| H | 23.92156 | -3.06577 | -0.40042 |
| H | 21.48358 | -3.96019 | 1.243074 |
| H | 21.5536  | -2.58387 | -1.48365 |
| H | 6.355679 | 3.100669 | 0.399488 |
| H | 8.636399 | 2.246677 | 0.178173 |

**Table S3:** Cartesian coordinates of **MSTD3**

| <b>Atom</b> | <b>X-axis</b> | <b>Y-axis</b> | <b>Z-axis</b> |
|-------------|---------------|---------------|---------------|
| C           | 1.220168      | 2.381066      | -0.21223      |
| C           | 0.730865      | 3.664134      | -0.01744      |
| C           | -0.67268      | 3.761045      | -0.05639      |
| C           | -1.26127      | 2.525491      | -0.28512      |
| C           | -3.37373      | 3.695001      | -0.16825      |
| C           | -2.70102      | 2.493518      | -0.34557      |
| C           | -4.77038      | 3.514273      | -0.24885      |
| C           | -5.16505      | 2.212808      | -0.48226      |
| S           | -3.76609      | 1.158021      | -0.60461      |
| S           | -0.1164       | 1.250506      | -0.45502      |
| C           | -6.76383      | 0.447409      | -1.23304      |
| C           | -6.51188      | 1.684492      | -0.61908      |
| C           | -7.61544      | 2.402004      | -0.13024      |
| C           | -8.90194      | 1.914042      | -0.26177      |
| C           | -9.14967      | 0.676502      | -0.87212      |
| C           | -8.04865      | -0.04839      | -1.34915      |
| H           | -8.2047       | -1.02471      | -1.80293      |
| H           | -5.49197      | 4.323679      | -0.16608      |
| C           | -10.959       | -0.78918      | -1.91233      |
| C           | -10.4955      | 0.140754      | -1.01037      |
| C           | -12.9338      | -0.39384      | -0.74327      |

|    |          |          |          |
|----|----------|----------|----------|
| C  | -12.3278 | -1.08916 | -1.76382 |
| H  | -10.33   | -1.21576 | -2.68763 |
| H  | -12.8676 | -1.77876 | -2.40777 |
| S  | -11.7799 | 0.640955 | 0.060593 |
| C  | -14.3027 | -0.44384 | -0.30449 |
| C  | -14.9801 | 0.420328 | 0.526964 |
| C  | -16.3216 | 0.048594 | 0.746334 |
| C  | -16.6941 | -1.09901 | 0.088159 |
| H  | -14.5216 | 1.313088 | 0.942362 |
| H  | -17.0131 | 0.637475 | 1.342975 |
| S  | -15.3437 | -1.74975 | -0.80891 |
| C  | 4.329211 | 0.172824 | -0.46468 |
| C  | 5.420208 | 0.999201 | -0.25565 |
| C  | 5.081765 | 2.375111 | -0.01445 |
| C  | 3.70705  | 2.841414 | -0.00059 |
| C  | 2.601196 | 1.947641 | -0.22465 |
| C  | 3.010926 | 0.642685 | -0.44643 |
| H  | 4.451174 | -0.88963 | -0.6522  |
| Si | -2.05977 | 5.023637 | 0.096581 |
| C  | -2.15737 | 5.824763 | 1.78783  |
| H  | -2.17868 | 5.066842 | 2.577258 |
| H  | -1.29014 | 6.471382 | 1.962145 |
| H  | -3.05873 | 6.44101  | 1.880735 |
| C  | -2.04199 | 6.318188 | -1.25801 |
| H  | -1.99212 | 5.847636 | -2.24504 |
| H  | -2.94345 | 6.940125 | -1.22109 |
| H  | -1.17434 | 6.979048 | -1.15334 |
| H  | 1.404207 | 4.496901 | 0.148709 |
| S  | 5.131814 | 4.718605 | 0.429218 |
| N  | 3.613435 | 4.148723 | 0.239773 |
| N  | 5.968368 | 3.337307 | 0.214838 |
| C  | 8.542031 | -1.00322 | -0.49998 |
| C  | 9.254385 | 0.150423 | -0.2012  |
| C  | 6.77059  | 0.506064 | -0.28121 |
| C  | 7.163684 | -0.79935 | -0.54362 |
| H  | 9.022163 | -1.95749 | -0.69655 |
| H  | 6.458605 | -1.59243 | -0.77358 |
| S  | 8.176772 | 1.504535 | 0.029629 |
| C  | 13.14434 | -0.08242 | 0.011458 |
| C  | 12.77512 | 1.257468 | 0.160725 |
| C  | 11.40062 | 1.467717 | 0.106055 |
| C  | 10.66482 | 0.30411  | -0.08169 |
| H  | 13.52084 | 2.028326 | 0.312118 |

|   |          |          |          |
|---|----------|----------|----------|
| H | 10.9365  | 2.44728  | 0.1863   |
| S | 11.71918 | -1.07888 | -0.1871  |
| F | 2.078518 | -0.29556 | -0.66757 |
| C | -17.9912 | -1.75776 | 0.086853 |
| C | -18.8781 | -1.54845 | 1.157084 |
| C | -18.3788 | -2.60822 | -0.96465 |
| C | -20.1053 | -2.18015 | 1.104754 |
| H | -18.585  | -0.93057 | 2.002462 |
| C | -19.6121 | -3.25306 | -0.97782 |
| H | -17.6991 | -2.75131 | -1.80169 |
| H | -19.8753 | -3.90847 | -1.80467 |
| C | -20.4992 | -3.02796 | 0.060028 |
| C | 16.68214 | -0.73526 | 0.923198 |
| C | 16.3239  | -1.99995 | 0.451589 |
| C | 17.26738 | -3.0158  | 0.470945 |
| C | 18.53807 | -2.74114 | 0.98644  |
| C | 18.87365 | -1.47137 | 1.465588 |
| C | 17.93032 | -0.44573 | 1.424731 |
| C | 14.45945 | -0.61001 | 0.127779 |
| H | 17.05525 | -4.02337 | 0.130319 |
| H | 18.17149 | 0.55682  | 1.768749 |
| C | 15.53903 | 0.19216  | 0.749586 |
| O | 15.53371 | 1.36471  | 1.083464 |
| C | 14.94205 | -1.9106  | -0.10958 |
| C | 14.33116 | -2.93108 | -0.85332 |
| N | 14.6282  | -4.3082  | -0.60752 |
| O | 14.62276 | -5.1071  | -1.53331 |
| O | 14.91349 | -4.60271 | 0.557818 |
| N | 13.46676 | -2.67012 | -1.96977 |
| O | 12.62296 | -3.50588 | -2.26883 |
| O | 13.59677 | -1.58802 | -2.53923 |
| H | -5.93439 | -0.13457 | -1.63096 |
| C | -22.1701 | -2.87602 | 1.6676   |
| C | -21.8491 | -3.5819  | 0.399091 |
| C | -23.1377 | -3.2924  | -0.39751 |
| H | -23.279  | -3.9652  | -1.24851 |
| C | -23.6223 | -2.79882 | 1.955815 |
| C | -24.2231 | -3.44111 | 0.680749 |
| H | -25.1758 | -2.98678 | 0.396633 |
| N | -21.1589 | -2.10168 | 2.049595 |
| C | -21.1448 | -1.19461 | 3.178249 |
| H | -20.3292 | -1.45884 | 3.859756 |
| H | -20.9973 | -0.16647 | 2.83076  |



|    |           |          |          |
|----|-----------|----------|----------|
| H  | -22.0914  | -1.26711 | 3.716684 |
| H  | -23.9305  | -3.31287 | 2.876961 |
| H  | -23.9309  | -1.74761 | 2.069879 |
| H  | -24.4144  | -4.50591 | 0.863402 |
| H  | -23.1035  | -2.26362 | -0.77988 |
| H  | -21.7946  | -4.67525 | 0.565319 |
| H  | -7.45507  | 3.352475 | 0.373225 |
| H  | -9.73557  | 2.508669 | 0.109437 |
| Cl | 19.69845  | -4.03449 | 1.017256 |
| Cl | 20.452256 | -1.13186 | 2.108775 |

**Table S4:** Cartesian coordinates of **MSTD4**

| <b>Atom</b> | <b>X-axis</b> | <b>Y-axis</b> | <b>Z-axis</b> |
|-------------|---------------|---------------|---------------|
| C           | 0.775387      | 2.249666      | -0.07429      |
| C           | 0.292474      | 3.549359      | -0.04461      |
| C           | -1.11         | 3.646366      | -0.10469      |
| C           | -1.70402      | 2.394107      | -0.18068      |
| C           | -3.80783      | 3.581606      | -0.25497      |
| C           | -3.1426       | 2.362814      | -0.26121      |
| C           | -5.20293      | 3.403088      | -0.35273      |
| C           | -5.60722      | 2.085449      | -0.43146      |
| S           | -4.21588      | 1.013755      | -0.37931      |
| S           | -0.56381      | 1.102152      | -0.17697      |
| C           | -7.19382      | 0.217287      | -0.907        |
| C           | -6.95407      | 1.553333      | -0.5463       |
| C           | -8.07245      | 2.36528       | -0.29499      |
| C           | -9.35784      | 1.872118      | -0.41386      |
| C           | -9.59271      | 0.537502      | -0.77429      |
| C           | -8.47853      | -0.28012      | -1.01057      |
| H           | -8.62641      | -1.32837      | -1.26107      |
| H           | -5.91356      | 4.225128      | -0.39067      |
| C           | -11.3516      | -1.09253      | -1.63597      |
| C           | -10.9363      | -0.00554      | -0.90115      |
| C           | -13.3951      | -0.47225      | -0.70826      |
| C           | -12.7316      | -1.3548       | -1.52884      |
| H           | -10.6776      | -1.66272      | -2.2677       |
| H           | -13.2377      | -2.15454      | -2.06366      |
| S           | -12.2833      | 0.696805      | -0.04107      |
| C           | -14.7915      | -0.43764      | -0.36559      |
| C           | -15.5248      | 0.581938      | 0.199994      |
| C           | -16.8787      | 0.248703      | 0.404903      |
| C           | -17.2053      | -1.02394      | 0.001042      |

|    |           |          |          |
|----|-----------|----------|----------|
| H  | -15.0971  | 1.553153 | 0.43126  |
| H  | -17.609   | 0.948313 | 0.80259  |
| S  | -15.795   | -1.84034 | -0.6291  |
| C  | 3.874561  | 0.015757 | -0.08842 |
| C  | 4.970999  | 0.860289 | -0.04431 |
| C  | 4.639107  | 2.258104 | 0.014936 |
| C  | 3.265679  | 2.726818 | 0.014498 |
| C  | 2.154621  | 1.813971 | -0.04721 |
| C  | 2.557036  | 0.48915  | -0.08887 |
| H  | 3.991698  | -1.06279 | -0.13114 |
| Si | -2.489451 | 4.927466 | -0.13353 |
| C  | -2.60762  | 5.9335   | 1.444171 |
| H  | -2.63926  | 5.28053  | 2.322074 |
| H  | -1.74183  | 6.597156 | 1.546286 |
| H  | -3.50931  | 6.556254 | 1.447899 |
| C  | -2.43868  | 6.043915 | -1.63819 |
| H  | -2.39514  | 5.454074 | -2.5592  |
| H  | -3.32668  | 6.684395 | -1.68397 |
| H  | -1.55721  | 6.69411  | -1.60999 |
| H  | 0.971048  | 4.392882 | 0.014675 |
| S  | 4.700804  | 4.640922 | 0.125562 |
| N  | 3.177409  | 4.054671 | 0.075153 |
| N  | 5.531014  | 3.240582 | 0.074138 |
| C  | 8.093841  | -1.15529 | -0.15472 |
| C  | 8.809031  | 0.032265 | -0.08994 |
| C  | 6.32188   | 0.367056 | -0.06299 |
| C  | 6.712668  | -0.96312 | -0.13986 |
| H  | 8.573735  | -2.12698 | -0.22984 |
| H  | 6.002532  | -1.78283 | -0.19396 |
| S  | 7.73344   | 1.403571 | -0.00206 |
| C  | 12.70749  | -0.12761 | -0.14203 |
| C  | 12.3216   | 1.214412 | -0.15744 |
| C  | 10.9419   | 1.398199 | -0.13476 |
| C  | 10.22207  | 0.21139  | -0.0964  |
| H  | 13.05732  | 2.00844  | -0.17859 |
| H  | 10.46081  | 2.372649 | -0.16017 |
| S  | 11.29579  | -1.16014 | -0.08401 |
| F  | 1.616066  | -0.46539 | -0.14043 |
| C  | -18.4991  | -1.68553 | 0.060811 |
| C  | -19.4629  | -1.24112 | 0.982844 |
| C  | -18.8093  | -2.77067 | -0.77979 |
| C  | -20.682   | -1.88899 | 0.997358 |
| H  | -19.2318  | -0.43368 | 1.673281 |

|    |           |          |          |
|----|-----------|----------|----------|
| C  | -20.0374  | -3.42302 | -0.72278 |
| H  | -18.0713  | -3.09987 | -1.50763 |
| H  | -20.2384  | -4.26355 | -1.38268 |
| C  | -20.998   | -2.97229 | 0.165551 |
| C  | 16.33578  | -0.62502 | 0.534611 |
| C  | 15.94576  | -1.94098 | 0.257751 |
| C  | 16.87839  | -2.96277 | 0.290985 |
| C  | 18.19424  | -2.65172 | 0.634686 |
| C  | 18.59424  | -1.34604 | 0.931751 |
| C  | 17.64067  | -0.31328 | 0.867619 |
| C  | 14.03855  | -0.6262  | -0.06424 |
| H  | 16.62578  | -3.99735 | 0.088205 |
| C  | 15.15221  | 0.263693 | 0.347447 |
| O  | 15.12334  | 1.467139 | 0.518402 |
| C  | 14.51445  | -1.93731 | -0.16093 |
| C  | 13.84484  | -3.06439 | -0.67569 |
| N  | 14.1464   | -4.37531 | -0.20111 |
| O  | 14.02941  | -5.34048 | -0.94321 |
| O  | 14.55753  | -4.44689 | 0.963395 |
| N  | 12.90989  | -2.97615 | -1.75774 |
| O  | 12.05622  | -3.84674 | -1.87475 |
| O  | 12.99577  | -1.99286 | -2.49331 |
| H  | -6.35338  | -0.44366 | -1.11171 |
| C  | -22.7808  | -2.46415 | 1.563066 |
| C  | -22.3655  | -3.45584 | 0.537507 |
| C  | -23.5988  | -3.41305 | -0.38795 |
| H  | -23.6718  | -4.28231 | -1.04796 |
| C  | -24.2496  | -2.35997 | 1.730272 |
| C  | -24.7537  | -3.31863 | 0.62271  |
| H  | -25.6907  | -2.97814 | 0.17466  |
| N  | -21.8041  | -1.60148 | 1.816346 |
| C  | -21.8757  | -0.44862 | 2.690382 |
| H  | -21.1425  | -0.54574 | 3.498092 |
| H  | -21.6592  | 0.462067 | 2.122422 |
| H  | -22.8747  | -0.38214 | 3.124661 |
| H  | -24.6126  | -2.63466 | 2.730351 |
| H  | -24.5777  | -1.32329 | 1.55553  |
| H  | -24.9426  | -4.30894 | 1.055548 |
| H  | -23.5516  | -2.5132  | -1.01537 |
| H  | -22.3161  | -4.46965 | 0.9808   |
| H  | -7.92838  | 3.399867 | 0.006808 |
| H  | -10.2001  | 2.538977 | -0.23474 |
| Cl | 19.343349 | -3.95177 | 0.691744 |

|    |           |          |          |
|----|-----------|----------|----------|
| Cl | 20.230107 | -0.99924 | 1.365414 |
| Cl | 18.110919 | 1.320236 | 1.190259 |

**Table S5:** Cartesian coordinates of **MSTD5**

| <b>Atom</b> | <b>X-axis</b> | <b>Y-axis</b> | <b>Z-axis</b> |
|-------------|---------------|---------------|---------------|
| C           | 1.529281      | 2.282962      | 0.020948      |
| C           | 1.053305      | 3.585591      | 0.022497      |
| C           | -0.34789      | 3.689043      | -0.06031      |
| C           | -0.9471       | 2.43875       | -0.12576      |
| C           | -3.04497      | 3.633033      | -0.24804      |
| C           | -2.38426      | 2.412079      | -0.22706      |
| C           | -4.43936      | 3.457444      | -0.36449      |
| C           | -4.84639      | 2.140057      | -0.43148      |
| S           | -3.45983      | 1.064827      | -0.34267      |
| S           | 0.185284      | 1.141143      | -0.0831       |
| C           | -6.42824      | 0.273699      | -0.92619      |
| C           | -6.19253      | 1.608707      | -0.55918      |
| C           | -7.31317      | 2.419126      | -0.3137       |
| C           | -8.59736      | 1.924957      | -0.44316      |
| C           | -8.82819      | 0.591048      | -0.80875      |
| C           | -7.71163      | -0.22474      | -1.04002      |
| H           | -7.85683      | -1.27233      | -1.2948       |
| H           | -5.14715      | 4.280589      | -0.4257       |
| C           | -10.5792      | -1.03746      | -1.68888      |
| C           | -10.1701      | 0.045772      | -0.94523      |
| C           | -12.6278      | -0.43064      | -0.76366      |
| C           | -11.9587      | -1.30522      | -1.58812      |
| H           | -9.90104      | -1.60109      | -2.3221       |
| H           | -12.4606      | -2.10303      | -2.12977      |
| S           | -11.5223      | 0.737725      | -0.08498      |
| C           | -14.0253      | -0.40464      | -0.42389      |
| C           | -14.7658      | 0.609158      | 0.142325      |
| C           | -16.118       | 0.266883      | 0.344688      |
| C           | -16.4357      | -1.00705      | -0.06179      |
| H           | -14.3444      | 1.582608      | 0.376109      |
| H           | -16.8533      | 0.96096       | 0.742837      |
| S           | -15.0195      | -1.81324      | -0.69138      |
| C           | 4.609962      | 0.02598       | 0.086995      |
| C           | 5.71353       | 0.862211      | 0.115142      |
| C           | 5.392954      | 2.263725      | 0.140129      |
| C           | 4.02309       | 2.743341      | 0.119451      |

---

|    |           |          |          |
|----|-----------|----------|----------|
| C  | 2.904926  | 1.838355 | 0.071963 |
| C  | 3.296854  | 0.50958  | 0.067098 |
| H  | 4.717829  | -1.05419 | 0.071639 |
| Si | -1.721985 | 4.974744 | -0.12687 |
| C  | -1.85814  | 6.003003 | 1.435221 |
| H  | -1.898    | 5.362422 | 2.321882 |
| H  | -0.99453  | 6.669576 | 1.537015 |
| H  | -2.76084  | 6.62412  | 1.420669 |
| C  | -1.64633  | 6.071566 | -1.64502 |
| H  | -1.59561  | 5.470362 | -2.55827 |
| H  | -2.52982  | 6.716696 | -1.70895 |
| H  | -0.76137  | 6.716885 | -1.61422 |
| H  | 1.735741  | 4.426271 | 0.078121 |
| S  | 5.473346  | 4.647926 | 0.193393 |
| N  | 3.945368  | 4.072854 | 0.146979 |
| N  | 6.292661  | 3.239894 | 0.181716 |
| C  | 8.809053  | -1.19308 | 0.042291 |
| C  | 9.541759  | -0.01448 | 0.084434 |
| C  | 7.058729  | 0.354638 | 0.109068 |
| C  | 7.43166   | -0.982   | 0.055785 |
| H  | 9.274806  | -2.17266 | -0.01736 |
| H  | 6.710771  | -1.79298 | 0.01593  |
| S  | 8.484662  | 1.373249 | 0.149387 |
| C  | 13.43275  | -0.27145 | -0.01136 |
| C  | 13.08268  | 1.081505 | -0.02919 |
| C  | 11.70928  | 1.302723 | 0.011686 |
| C  | 10.95737  | 0.135636 | 0.066449 |
| H  | 13.84117  | 1.853806 | -0.06645 |
| H  | 11.25533  | 2.290033 | -0.01328 |
| S  | 11.99455  | -1.26435 | 0.07445  |
| F  | 2.348794  | -0.43885 | 0.033781 |
| C  | -17.7252  | -1.67793 | -0.0035  |
| C  | -18.6909  | -1.24291 | 0.920824 |
| C  | -18.0283  | -2.76258 | -0.84707 |
| C  | -19.9056  | -1.8992  | 0.935274 |
| H  | -18.4643  | -0.43598 | 1.61333  |
| C  | -19.2519  | -3.42364 | -0.79037 |
| H  | -17.2888  | -3.08435 | -1.57669 |
| H  | -19.4479  | -4.26361 | -1.45253 |
| C  | -20.2145  | -2.98249 | 0.10044  |
| C  | 17.05031  | -0.86317 | 0.584928 |
| C  | 16.62353  | -2.17858 | 0.35907  |
| C  | 17.52953  | -3.22789 | 0.404457 |

---

|   |          |          |          |
|---|----------|----------|----------|
| C | 18.8528  | -2.92512 | 0.701919 |
| C | 19.28715 | -1.62616 | 0.935246 |
| C | 18.36934 | -0.57925 | 0.867486 |
| C | 14.74935 | -0.80583 | 0.044755 |
| H | 17.25885 | -4.26717 | 0.255611 |
| C | 15.90277 | 0.059119 | 0.40609  |
| O | 15.92651 | 1.267376 | 0.548071 |
| C | 15.18416 | -2.13487 | -0.03335 |
| C | 14.47224 | -3.24828 | -0.5184  |
| N | 14.75352 | -4.56246 | -0.03856 |
| O | 14.61341 | -5.52917 | -0.77481 |
| O | 15.17184 | -4.63608 | 1.122954 |
| N | 13.52738 | -3.15289 | -1.59181 |
| O | 12.65113 | -4.00384 | -1.68434 |
| O | 13.62886 | -2.18482 | -2.34505 |
| H | -5.58542 | -0.38505 | -1.12818 |
| C | -21.9997 | -2.49231 | 1.501781 |
| C | -21.5784 | -3.47716 | 0.471703 |
| C | -22.8113 | -3.43751 | -0.45453 |
| H | -22.8798 | -4.30488 | -1.11764 |
| C | -23.4693 | -2.3941  | 1.666107 |
| C | -23.9676 | -3.35186 | 0.555205 |
| H | -24.9059 | -3.01481 | 0.107284 |
| N | -21.0278 | -1.6226  | 1.756371 |
| C | -21.1066 | -0.47387 | 2.634695 |
| H | -20.3705 | -0.56735 | 3.440237 |
| H | -20.9001 | 0.441338 | 2.070181 |
| H | -22.105  | -0.41788 | 3.072138 |
| H | -23.8344 | -2.67293 | 2.664384 |
| H | -23.8015 | -1.35828 | 1.493104 |
| H | -24.1518 | -4.34445 | 0.984913 |
| H | -22.7678 | -2.53523 | -1.07879 |
| H | -21.5218 | -4.49332 | 0.908843 |
| H | -7.17169 | 3.452556 | -0.0065  |
| H | -9.44175 | 2.590119 | -0.26763 |
| F | 19.75411 | -3.89956 | 0.77271  |
| F | 20.56267 | -1.38461 | 1.215337 |
| F | 18.79962 | 0.656742 | 1.064797 |

**Table S6:** Cartesian coordinates of **MSTD6**

| Atom | X-axis | Y-axis | Z-axis |
|------|--------|--------|--------|
|------|--------|--------|--------|

---

|    |           |          |          |
|----|-----------|----------|----------|
| C  | 0.828015  | 2.251728 | -0.04458 |
| C  | 0.33778   | 3.548239 | -0.00791 |
| C  | -1.06513  | 3.637569 | -0.0679  |
| C  | -1.65202  | 2.382525 | -0.15099 |
| C  | -3.76129  | 3.560322 | -0.22116 |
| C  | -3.09086  | 2.344553 | -0.23286 |
| C  | -5.15545  | 3.376493 | -0.32115 |
| C  | -5.55406  | 2.057671 | -0.40666 |
| S  | -4.15841  | 0.991541 | -0.35864 |
| S  | -0.50438  | 1.097059 | -0.15387 |
| C  | -7.13607  | 0.186895 | -0.8906  |
| C  | -6.89937  | 1.522151 | -0.52519 |
| C  | -8.01946  | 2.33143  | -0.27306 |
| C  | -9.30375  | 1.836744 | -0.39612 |
| C  | -9.53565  | 0.503023 | -0.76155 |
| C  | -8.41993  | -0.31221 | -0.99834 |
| H  | -8.5657   | -1.35981 | -1.25283 |
| H  | -5.86941  | 4.19578  | -0.35567 |
| C  | -11.2924  | -1.12482 | -1.63325 |
| C  | -10.8787  | -0.0405  | -0.89342 |
| C  | -13.3379  | -0.50611 | -0.70913 |
| C  | -12.6729  | -1.38648 | -1.5309  |
| H  | -10.6169  | -1.69304 | -2.26515 |
| H  | -13.178   | -2.1838  | -2.07026 |
| S  | -12.2272  | 0.65949  | -0.03436 |
| C  | -14.7352  | -0.47016 | -0.37083 |
| C  | -15.4687  | 0.551465 | 0.191352 |
| C  | -16.8232  | 0.22029  | 0.393409 |
| C  | -17.1505  | -1.05247 | -0.00998 |
| H  | -15.0402  | 1.52263  | 0.42131  |
| H  | -17.5534  | 0.921785 | 0.787973 |
| S  | -15.7394  | -1.87208 | -0.63472 |
| C  | 3.944751  | 0.040881 | -0.07144 |
| C  | 5.033818  | 0.893578 | -0.02505 |
| C  | 4.691316  | 2.288296 | 0.040427 |
| C  | 3.314704  | 2.746417 | 0.044024 |
| C  | 2.210577  | 1.825324 | -0.02026 |
| C  | 2.622716  | 0.504254 | -0.06801 |
| H  | 4.070441  | -1.03652 | -0.12    |
| Si | -2.450268 | 4.912352 | -0.09089 |
| C  | -2.57494  | 5.908014 | 1.492786 |
| H  | -2.60585  | 5.249431 | 2.366511 |
| H  | -1.71171  | 6.574073 | 1.600715 |

|   |          |          |          |
|---|----------|----------|----------|
| H | -3.47875 | 6.527646 | 1.498812 |
| C | -2.40335 | 6.037301 | -1.58916 |
| H | -2.35572 | 5.452919 | -2.51344 |
| H | -3.29445 | 6.673625 | -1.63244 |
| H | -1.52524 | 6.691776 | -1.55623 |
| H | 1.011326 | 4.395443 | 0.055939 |
| S | 4.734966 | 4.670936 | 0.161571 |
| N | 3.216363 | 4.073363 | 0.110692 |
| N | 5.575603 | 3.277645 | 0.102627 |
| C | 8.181696 | -1.08665 | -0.14354 |
| C | 8.880608 | 0.109551 | -0.08575 |
| C | 6.390452 | 0.412851 | -0.04732 |
| C | 6.796828 | -0.91195 | -0.12231 |
| H | 8.673331 | -2.05257 | -0.2176  |
| H | 6.097199 | -1.7411  | -0.16958 |
| S | 7.788647 | 1.466697 | 0.004507 |
| C | 12.78246 | 0.028775 | -0.14553 |
| C | 12.36932 | 1.360242 | -0.17195 |
| C | 10.98502 | 1.515075 | -0.14925 |
| C | 10.29203 | 0.314121 | -0.09896 |
| H | 13.08628 | 2.171056 | -0.19976 |
| H | 10.48356 | 2.478849 | -0.18299 |
| S | 11.3944  | -1.03387 | -0.07673 |
| F | 1.689224 | -0.45712 | -0.12299 |
| C | -18.4461 | -1.70978 | 0.046572 |
| C | -19.4136 | -1.26155 | 0.963786 |
| C | -18.7567 | -2.79453 | -0.79427 |
| C | -20.6341 | -1.90597 | 0.970812 |
| H | -19.1836 | -0.45459 | 1.65504  |
| C | -19.9866 | -3.44338 | -0.7443  |
| H | -18.0161 | -3.12651 | -1.51823 |
| H | -20.1867 | -4.28336 | -1.40498 |
| C | -20.9504 | -2.98761 | 0.13837  |
| C | 16.41304 | -0.36592 | 0.546608 |
| C | 16.08042 | -1.68849 | 0.252506 |
| C | 17.07714 | -2.6587  | 0.286858 |
| C | 18.35849 | -2.26628 | 0.655171 |
| C | 18.67101 | -0.93966 | 0.953129 |
| C | 17.68316 | 0.036653 | 0.891544 |
| C | 14.12826 | -0.43245 | -0.0597  |
| H | 16.89189 | -3.70776 | 0.085469 |
| H | 17.91824 | 1.079523 | 1.084444 |
| C | 15.21012 | 0.485765 | 0.358669 |



|   |          |          |          |
|---|----------|----------|----------|
| O | 15.17984 | 1.689544 | 0.540608 |
| C | 14.64835 | -1.73017 | -0.16457 |
| C | 14.01648 | -2.87715 | -0.68234 |
| N | 14.36451 | -4.179   | -0.21738 |
| O | 14.22317 | -5.15085 | -0.94462 |
| O | 14.83577 | -4.23514 | 0.926579 |
| N | 13.06352 | -2.80708 | -1.75169 |
| O | 12.22465 | -3.69201 | -1.85958 |
| O | 13.12305 | -1.82001 | -2.4848  |
| H | -6.29416 | -0.47197 | -1.0959  |
| C | -22.7373 | -2.47206 | 1.528149 |
| C | -22.3198 | -3.46616 | 0.50732  |
| C | -23.5543 | -3.43004 | -0.41646 |
| H | -23.6235 | -4.30094 | -1.07433 |
| C | -24.2057 | -2.3776  | 1.701924 |
| C | -24.7083 | -3.33927 | 0.596198 |
| H | -25.6467 | -3.00204 | 0.149102 |
| N | -21.7625 | -1.61399 | 1.784726 |
| C | -21.8339 | -0.45878 | 2.657097 |
| H | -21.105  | -0.55933 | 3.467853 |
| H | -21.609  | 0.448574 | 2.087419 |
| H | -22.8349 | -0.38661 | 3.085814 |
| H | -24.5597 | -2.65356 | 2.704585 |
| H | -24.5397 | -1.34287 | 1.528869 |
| H | -24.8935 | -4.32968 | 1.030009 |
| H | -23.5122 | -2.53163 | -1.04618 |
| H | -22.271  | -4.47512 | 0.960604 |
| H | -7.87761 | 3.365195 | 0.032432 |
| H | -10.1474 | 2.501864 | -0.21671 |
| N | 19.34008 | -3.35054 | 0.834284 |
| O | 19.91852 | -3.39256 | 1.903373 |
| O | 19.44395 | -4.15017 | -0.07603 |
| N | 20.04452 | -0.50235 | 1.207906 |
| O | 20.94109 | -1.12085 | 0.6605   |
| O | 20.188   | 0.483701 | 1.911569 |

**Table S7:** Cartesian coordinates of **MSTD7**

| <b>Atom</b> | <b>X-axis</b> | <b>Y-axis</b> | <b>Z-axis</b> |
|-------------|---------------|---------------|---------------|
| C           | 0.243332      | 2.270535      | -0.09533      |
| C           | -0.24196      | 3.569722      | -0.09751      |
| C           | -1.64405      | 3.662593      | -0.16741      |

|    |           |          |          |
|----|-----------|----------|----------|
| C  | -2.23505  | 2.407483 | -0.21877 |
| C  | -4.34073  | 3.588875 | -0.32424 |
| C  | -3.67313  | 2.371412 | -0.30374 |
| C  | -5.73499  | 3.405493 | -0.42187 |
| C  | -6.13613  | 2.085418 | -0.47508 |
| S  | -4.74302  | 1.017894 | -0.39789 |
| S  | -1.09275  | 1.118256 | -0.17961 |
| C  | -7.71864  | 0.208595 | -0.92915 |
| C  | -7.48158  | 1.548744 | -0.58175 |
| C  | -8.6013   | 2.360539 | -0.33527 |
| C  | -9.88562  | 1.863017 | -0.4457  |
| C  | -10.1178  | 0.524315 | -0.79267 |
| C  | -9.0023   | -0.29287 | -1.0248  |
| H  | -9.14822  | -1.34377 | -1.26517 |
| H  | -6.44743  | 4.224867 | -0.47881 |
| C  | -11.8752  | -1.11919 | -1.63171 |
| C  | -11.46    | -0.02368 | -0.9088  |
| C  | -13.9158  | -0.49684 | -0.69929 |
| C  | -13.2532  | -1.38486 | -1.51532 |
| H  | -11.2022  | -1.69298 | -2.26123 |
| H  | -13.7588  | -2.19141 | -2.04041 |
| S  | -12.8047  | 0.682613 | -0.049   |
| C  | -15.3099  | -0.46381 | -0.35018 |
| C  | -16.0403  | 0.554279 | 0.223575 |
| C  | -17.3922  | 0.220667 | 0.434674 |
| C  | -17.7217  | -1.05081 | 0.027591 |
| H  | -15.6108  | 1.524237 | 0.45663  |
| H  | -18.1193  | 0.919832 | 0.838993 |
| S  | -16.3149  | -1.86509 | -0.61415 |
| C  | 3.347546  | 0.044293 | -0.03983 |
| C  | 4.441129  | 0.892012 | -0.01611 |
| C  | 4.106337  | 2.289909 | 0.00646  |
| C  | 2.732423  | 2.755451 | -0.01066 |
| C  | 1.623364  | 1.838735 | -0.05151 |
| C  | 2.028276  | 0.514447 | -0.05591 |
| H  | 3.467302  | -1.03474 | -0.05409 |
| Si | -3.025492 | 4.940593 | -0.22861 |
| C  | -3.15023  | 5.980587 | 1.326168 |
| H  | -3.17995  | 5.347361 | 2.218481 |
| H  | -2.28772  | 6.650483 | 1.414421 |
| H  | -4.05472  | 6.599136 | 1.314862 |
| C  | -2.97443  | 6.023141 | -1.75754 |
| H  | -2.92905  | 5.413942 | -2.66576 |

|   |          |          |          |
|---|----------|----------|----------|
| H | -3.86347 | 6.660962 | -1.81772 |
| H | -2.0943  | 6.675551 | -1.74247 |
| H | 0.434685 | 4.415722 | -0.05308 |
| S | 4.162922 | 4.674734 | 0.054249 |
| N | 2.641232 | 4.084225 | 0.014047 |
| N | 4.995933 | 3.2758   | 0.042868 |
| C | 7.571607 | -1.11563 | -0.08754 |
| C | 8.280781 | 0.07499  | -0.05485 |
| C | 5.79432  | 0.40117  | -0.02354 |
| C | 6.188453 | -0.92844 | -0.07013 |
| H | 8.05457  | -2.08708 | -0.14382 |
| H | 5.481512 | -1.75201 | -0.10217 |
| S | 7.201857 | 1.443486 | 0.007056 |
| C | 12.17815 | -0.06703 | -0.14883 |
| C | 11.79001 | 1.268994 | -0.19805 |
| C | 10.40705 | 1.448581 | -0.16332 |
| C | 9.695631 | 0.261708 | -0.07946 |
| H | 12.51921 | 2.067152 | -0.2567  |
| H | 9.921907 | 2.419806 | -0.21538 |
| S | 10.77468 | -1.1035  | -0.03616 |
| F | 1.089919 | -0.44326 | -0.08441 |
| C | -19.0148 | -1.71055 | 0.090716 |
| C | -19.9806 | -1.26124 | 1.009378 |
| C | -19.3262 | -2.80124 | -0.74346 |
| C | -21.1978 | -1.91021 | 1.023878 |
| H | -19.7512 | -0.4502  | 1.696034 |
| C | -20.5534 | -3.45373 | -0.6855  |
| H | -18.5874 | -3.1352  | -1.46832 |
| H | -20.7528 | -4.29775 | -1.34114 |
| C | -21.5156 | -2.99691 | 0.19883  |
| C | 15.81157 | -0.56253 | 0.506646 |
| C | 15.444   | -1.8624  | 0.15471  |
| C | 16.40942 | -2.85804 | 0.083799 |
| C | 17.72099 | -2.52541 | 0.40307  |
| C | 18.09507 | -1.23561 | 0.761578 |
| C | 17.11698 | -0.24774 | 0.815871 |
| C | 13.51595 | -0.56318 | -0.08054 |
| H | 16.18838 | -3.88568 | -0.17989 |
| C | 14.62187 | 0.330439 | 0.316969 |
| O | 14.6279  | 1.538119 | 0.444066 |
| C | 13.99934 | -1.86659 | -0.21187 |
| C | 13.33119 | -3.00224 | -0.71516 |
| N | 13.65082 | -4.30343 | -0.23428 |

|   |          |          |          |
|---|----------|----------|----------|
| O | 13.44425 | -5.28874 | -0.9272  |
| O | 14.1714  | -4.34775 | 0.890071 |
| N | 12.3613  | -2.90885 | -1.7659  |
| O | 11.50127 | -3.77415 | -1.86282 |
| O | 12.43121 | -1.92035 | -2.49669 |
| H | -6.87701 | -0.45192 | -1.13017 |
| C | -23.2966 | -2.47497 | 1.591526 |
| C | -22.8819 | -3.47627 | 0.576968 |
| C | -24.1239 | -3.45247 | -0.33747 |
| H | -24.193  | -4.32813 | -0.98873 |
| C | -24.7635 | -2.39425 | 1.78271  |
| C | -25.2704 | -3.36217 | 0.684086 |
| H | -26.2133 | -3.02983 | 0.242985 |
| N | -22.3256 | -1.61569 | 1.841088 |
| C | -22.3971 | -0.45566 | 2.708543 |
| H | -21.6661 | -0.55261 | 3.517547 |
| H | -22.1742 | 0.448342 | 2.133237 |
| H | -23.3973 | -0.38269 | 3.138975 |
| H | -25.0998 | -2.67211 | 2.790708 |
| H | -25.1082 | -1.36279 | 1.613499 |
| H | -25.449  | -4.35146 | 1.12297  |
| H | -24.0918 | -2.55831 | -0.97372 |
| H | -22.8306 | -4.47973 | 1.0422   |
| H | -8.45878 | 3.398126 | -0.04331 |
| H | -10.7291 | 2.529397 | -0.27037 |
| N | 18.70349 | -3.62181 | 0.444819 |
| O | 19.56954 | -3.55303 | 1.298423 |
| O | 18.55146 | -4.5272  | -0.3527  |
| N | 19.49477 | -0.86841 | 1.026034 |
| O | 20.29183 | -1.09687 | 0.140187 |
| O | 19.71662 | -0.33507 | 2.09523  |
| N | 17.50121 | 1.133903 | 1.159607 |
| O | 16.98131 | 1.612198 | 2.142764 |
| O | 18.31923 | 1.660889 | 0.427899 |

**Table S8:** Calculated energies (E) and energy gap ( $\Delta E$ ) for **(DTS(FBTTh<sub>2</sub>)<sub>2</sub>R1** and **MSTD2-MSTD7)**

| Compounds                                   | E <sub>LUMO+1</sub> | E <sub>HOMO-1</sub> | $\Delta E$ (eV) | E <sub>LUMO+2</sub> | E <sub>HOMO+2</sub> | $\Delta E$ (eV) |
|---------------------------------------------|---------------------|---------------------|-----------------|---------------------|---------------------|-----------------|
| <b>DTS(FBTTh<sub>2</sub>)<sub>2</sub>R1</b> | -2.551              | -5.611              | 3.06            | -1.534              | -6.041              | 4.507           |
| <b>MSTD2</b>                                | -2.651              | -5.461              | 2.81            | -2.216              | -5.289              | 3.073           |
| <b>MSTD3</b>                                | -2.704              | -5.360              | 2.656           | -2.385              | -5.858              | 3.385           |
| <b>MSTD4</b>                                | -2.740              | -5.382              | 2.642           | -2.452              | -5.874              | 3.422           |
| <b>MSTD5</b>                                | -2.706              | -5.358              | 2.652           | -2.360              | -5.863              | 3.503           |
| <b>MSTD6</b>                                | -2.776              | -5.445              | 2.669           | -2.671              | -5.907              | 3.236           |

**MSTD7**      -2.751      -5.506      2.755      -2.743      -5.929      3.186

$E$ = energy,  $\Delta E(eV) = E_{LUMO} - E_{HOMO}$ ; HOMO= highest occupied molecular orbital; LUMO= lowest unoccupied molecular orbital, MO, molecular orbital, Units in eV

**Table S9:** Calculated global reactivity parameters using energies of HOMO and LUMO orbitals of studied compound (**DTS(FBTTh<sub>2</sub>)<sub>2</sub>R1** and **MSTD2- MSTD7**)

| Compounds                                   | <i>IP</i> | <i>EA</i> | <i>X</i>   | $\eta$    | $\mu$    | $\omega$ | $\sigma$ |
|---------------------------------------------|-----------|-----------|------------|-----------|----------|----------|----------|
| <b>DTS(FBTTh<sub>2</sub>)<sub>2</sub>R1</b> | 0.188104  | 0.102469  | 0.14528617 | 0.042818  | -0.14529 | 0.246489 | 11.67746 |
| <b>MSTD2</b>                                | 0.175346  | 0.105582  | 0.1404637  | 0.034882  | -0.14046 | 0.28281  | 14.33398 |
| <b>MSTD3</b>                                | 0.179225  | 0.104203  | 0.14171432 | 0.0037511 | -0.14171 | 0.267695 | 13.32948 |
| <b>MSTD4</b>                                | 0.181187  | 0.10335   | 0.142268   | 0.038918  | -0.14227 | 0.260034 | 12.84739 |
| <b>MSTD5</b>                                | 0.179397  | 0.103804  | 0.14160038 | 0.037796  | -0.1416  | 0.265246 | 13.22881 |
| <b>MSTD6</b>                                | 0.184506  | 0.114325  | 0.14941547 | 0.03509   | -0.14942 | 0.318108 | 14.24898 |
| <b>MSTD7</b>                                | 0.186569  | 0.12179   | 0.15417947 | 0.032389  | -0.15418 | 0.36696  | 15.4371  |

*IP*= ionization potential, *EA*= electron affinity, *X*= electro negativity,  $\mu$ =chemical potential,  $\eta$ =global hardness,  $\sigma$  = global softness and  $\omega$ = global electrophilicity. Units in Hartree ( $E_h$ )

**Table S10:** Natural bond orbital (NBO) analysis of investigated compound **DTS(FBTTh<sub>2</sub>)<sub>2</sub>R1** by using M06 6-31G(d,p).

| Donor(i) | Type     | Acceptor(j) | Type       | $E(2)^a$ [kcal/mol] | $E(J)E(i)^b$ (a.u) | $F(I,j)^c$ (a.u) |
|----------|----------|-------------|------------|---------------------|--------------------|------------------|
| C11-C12  | $\pi$    | C13-N20     | $\pi^*$    | 26.73               | 0.27               | 0.080            |
| C39-C40  | $\pi$    | C38-N54     | $\pi^*$    | 26.73               | 0.27               | 0.080            |
| C15-C16  | $\pi$    | C14-N19     | $\pi^*$    | 25.38               | 0.26               | 0.076            |
| C35-C36  | $\pi$    | C39-C40     | $\pi^*$    | 21.30               | 0.30               | 0.073            |
| C3-C4    | $\pi$    | C1-C2       | $\pi^*$    | 19.76               | 0.30               | 0.071            |
| C1-C2    | $\pi$    | C39-C40     | $\pi^*$    | 18.01               | 0.30               | 0.068            |
| C11-C12  | $\pi$    | C15-C16     | $\pi^*$    | 17.53               | 0.32               | 0.067            |
| C21-C22  | $\pi$    | C23-C24     | $\pi^*$    | 16.59               | 0.31               | 0.066            |
| C28-C29  | $\pi$    | C30-C31     | $\pi^*$    | 15.76               | 0.32               | 0.065            |
| C11-C12  | $\pi$    | C7-C8       | $\pi^*$    | 14.83               | 0.32               | 0.062            |
| C15-C16  | $\pi$    | C21-C22     | $\pi^*$    | 12.71               | 0.30               | 0.057            |
| C14-N19  | $\pi$    | C15-C16     | $\pi^*$    | 9.90                | 0.38               | 0.057            |
| C13-N20  | $\pi$    | C11-C12     | $\pi^*$    | 8.61                | 0.37               | 0.053            |
| C39-C40  | $\pi$    | C39-C40     | $\pi^*$    | 1.02                | 0.31               | 0.016            |
| C5-C6    | $\pi$    | C5-C6       | $\pi^*$    | 0.68                | 0.30               | 0.013            |
| N20-S51  | $\sigma$ | C12-C13     | $\sigma^*$ | 8.32                | 1.27               | 0.092            |
| C3-Si42  | $\sigma$ | C4-S10      | $\sigma^*$ | 7.98                | 0.72               | 0.068            |
| C70-H71  | $\sigma$ | C63-S69     | $\sigma^*$ | 6.47                | 0.72               | 0.061            |
| C28-C29  | $\sigma$ | C23-C28     | $\sigma^*$ | 5.39                | 1.26               | 0.074            |
| C23-C24  | $\sigma$ | C23-C28     | $\sigma^*$ | 5.17                | 1.26               | 0.072            |
| C21-C24  | $\sigma$ | C23-C28     | $\sigma^*$ | 4.96                | 1.22               | 0.070            |
| C5-C7    | $\sigma$ | C8-C12      | $\sigma^*$ | 4.16                | 1.21               | 0.063            |
| C1-C39   | $\sigma$ | C1-C2       | $\sigma^*$ | 3.99                | 1.29               | 0.064            |
| C5-C6    | $\sigma$ | C5-C7       | $\sigma^*$ | 3.45                | 1.29               | 0.060            |
| C36-C37  | $\sigma$ | C37-N55     | $\sigma^*$ | 3.04                | 1.20               | 0.054            |

|          |          |          |            |       |      |       |
|----------|----------|----------|------------|-------|------|-------|
| C58-C59  | $\sigma$ | C56-H60  | $\sigma^*$ | 2.93  | 1.18 | 0.053 |
| Si42-C43 | $\sigma$ | Si42-C47 | $\sigma^*$ | 2.45  | 0.77 | 0.039 |
| C12-C13  | $\sigma$ | C13-C14  | $\sigma^*$ | 2.14  | 1.19 | 0.045 |
| C29-H32  | $\sigma$ | C28-C29  | $\sigma^*$ | 1.96  | 1.13 | 0.042 |
| C64-C65  | $\sigma$ | C64-H67  | $\sigma^*$ | 1.09  | 1.13 | 0.031 |
| C38-N54  | $\sigma$ | C39-C40  | $\sigma^*$ | 0.98  | 1.47 | 0.034 |
| C4-C6    | $\sigma$ | C6-S9    | $\sigma^*$ | 0.71  | 0.95 | 0.023 |
| C7-C8    | $\sigma$ | C6-S9    | $\sigma^*$ | 0.50  | 0.95 | 0.020 |
| S9       | LP(2)    | C5-C6    | $\pi^*$    | 27.05 | 0.28 | 0.078 |
| S27      | LP(2)    | C23-C24  | $\pi^*$    | 24.61 | 0.28 | 0.074 |
| S62      | LP(2)    | C56-C57  | $\pi^*$    | 24.61 | 0.28 | 0.074 |
| S51      | LP(2)    | C14-N19  | $\pi^*$    | 23.33 | 0.26 | 0.071 |
| S51      | LP(2)    | C13-N20  | $\pi^*$    | 22.71 | 0.26 | 0.070 |
| S9       | LP(2)    | C7-C8    | $\pi^*$    | 20.82 | 0.28 | 0.068 |
| F79      | LP(3)    | C39-C40  | $\pi^*$    | 20.52 | 0.46 | 0.094 |
| N19      | LP(1)    | C13-C14  | $\sigma^*$ | 7.67  | 0.94 | 0.076 |
| F78      | LP(2)    | C11-C16  | $\sigma^*$ | 6.85  | 1.01 | 0.074 |
| F78      | LP(2)    | C11-C12  | $\sigma^*$ | 5.48  | 1.04 | 0.067 |
| N20      | LP(1)    | N19-S51  | $\sigma^*$ | 4.72  | 0.67 | 0.050 |
| S51      | LP(1)    | C13-N20  | $\sigma^*$ | 3.25  | 1.18 | 0.055 |
| S9       | LP(1)    | C5-C6    | $\sigma^*$ | 2.79  | 1.23 | 0.052 |
| S27      | LP(1)    | C23-C24  | $\sigma^*$ | 2.44  | 1.25 | 0.049 |
| S27      | LP(1)    | C21-C22  | $\sigma^*$ | 1.92  | 1.25 | 0.044 |
| F79      | LP(1)    | C4-S10   | $\sigma^*$ | 0.81  | 1.28 | 0.029 |
| N54      | LP(1)    | C38-C39  | $\sigma^*$ | 0.57  | 0.97 | 0.021 |

LP= lone pair, (i) donor; (j) acceptor; E(2) means energy of hyper conjugative interaction (stabilization energy); E(j) - E(i) is the energy difference between donor and acceptor i and j NBO orbitals; F(i, j) is the Fock matrix element between i and j NBO orbitals.

**Table S11:** Natural bond orbital (NBO) analysis of investigated compound **MSTD2** by using M06 6-31g(d,p).

| Donor(i) | Type  | Acceptor(j) | Type    | E(2) <sup>a</sup> [kcal/mol] | E(J)E(i) <sup>b</sup> (a.u) | F(I,j) <sup>c</sup> (a.u) |
|----------|-------|-------------|---------|------------------------------|-----------------------------|---------------------------|
| C1-C2    | $\pi$ | C83-C113    | $\pi^*$ | 26.69                        | 0.31                        | 0.082                     |
| C7-C8    | $\pi$ | C70-C73     | $\pi^*$ | 23.18                        | 0.29                        | 0.076                     |
| C26-C27  | $\pi$ | C78-C79     | $\pi^*$ | 20.81                        | 0.3                         | 0.07                      |
| C36-N51  | $\pi$ | C107-C108   | $\pi^*$ | 19.14                        | 0.29                        | 0.068                     |
| C53-C54  | $\pi$ | C103-C104   | $\pi^*$ | 18.15                        | 0.3                         | 0.067                     |
| C68-C69  | $\pi$ | C62-C63     | $\pi^*$ | 16.88                        | 0.29                        | 0.064                     |
| C71-C76  | $\pi$ | C19-C20     | $\pi^*$ | 14.97                        | 0.28                        | 0.059                     |
| C80-C81  | $\pi$ | C14-C15     | $\pi^*$ | 12.58                        | 0.32                        | 0.059                     |
| C83-C113 | $\pi$ | C68-C69     | $\pi^*$ | 10.79                        | 0.32                        | 0.055                     |
| C88-O89  | $\pi$ | C37-C38     | $\pi^*$ | 8.83                         | 0.37                        | 0.054                     |
| C90-C91  | $\pi$ | C83-C113    | $\pi^*$ | 6.76                         | 0.35                        | 0.044                     |
| N92-O93  | $\pi$ | N115-O117   | $\pi^*$ | 3.28                         | 0.18                        | 0.024                     |

|           |          |           |            |        |      |       |
|-----------|----------|-----------|------------|--------|------|-------|
| C107-C108 | $\pi$    | C71-C76   | $\pi^*$    | 0.72   | 0.28 | 0.013 |
| N115-O117 | $\pi$    | C90-C91   | $\pi^*$    | 0.53   | 0.33 | 0.012 |
| C1-C2     | $\sigma$ | C36-C37   | $\sigma^*$ | 8.35   | 1.27 | 0.092 |
| C1-C2     | $\sigma$ | C4-S10    | $\sigma^*$ | 7.97   | 0.72 | 0.068 |
| C1-S10    | $\sigma$ | C71-N96   | $\sigma^*$ | 6.01   | 1.16 | 0.075 |
| C2-C3     | $\sigma$ | C20-S25   | $\sigma^*$ | 5.27   | 0.74 | 0.056 |
| C3-Si40   | $\sigma$ | C60-C113  | $\sigma^*$ | 4.99   | 1.3  | 0.072 |
| C5-C7     | $\sigma$ | C28-C29   | $\sigma^*$ | 4.46   | 1.29 | 0.068 |
| C7-H18    | $\sigma$ | C14-C15   | $\sigma^*$ | 4.19   | 1.1  | 0.061 |
| C11-H95   | $\sigma$ | C79-C80   | $\sigma^*$ | 3.95   | 1.11 | 0.059 |
| C20-S25   | $\sigma$ | C21-C26   | $\sigma^*$ | 3.41   | 1.19 | 0.057 |
| C28-H31   | $\sigma$ | C56-H58   | $\sigma^*$ | 2.99   | 1.18 | 0.053 |
| C41-H44   | $\sigma$ | C62-C63   | $\sigma^*$ | 2.35   | 1.3  | 0.049 |
| C60-S66   | $\sigma$ | C71-N96   | $\sigma^*$ | 2.08   | 1.17 | 0.044 |
| C61-C62   | $\sigma$ | C11-C12   | $\sigma^*$ | 1.99   | 1.31 | 0.046 |
| C77-C78   | $\sigma$ | C79-C80   | $\sigma^*$ | 1.33   | 1.26 | 0.037 |
| C81-H86   | $\sigma$ | C70-C73   | $\sigma^*$ | 1.09   | 1.13 | 0.031 |
| C83-C90   | $\sigma$ | C14-C15   | $\sigma^*$ | 0.99   | 1.1  | 0.029 |
| C113-H114 | $\sigma$ | Si40-C45  | $\sigma^*$ | 0.52   | 0.77 | 0.018 |
| N115-O117 | $\sigma$ | C29-S32   | $\sigma^*$ | 0.51   | 0.95 | 0.02  |
| S9        | LP(1)    | N115-O116 | $\pi^*$    | 21.34  | 0.74 | 0.113 |
| S50       | LP(1)    | C91-N92   | $\pi^*$    | 13.92  | 0.61 | 0.082 |
| O94       | LP(2)    | C7-C8     | $\pi^*$    | 2.08   | 1.26 | 0.046 |
| O117      | LP(2)    | C113-H114 | $\pi^*$    | 0.54   | 1.09 | 0.022 |
| S9        | LP(2)    | N115-O117 | $\sigma^*$ | 177.19 | 0.16 | 0.152 |
| S50       | LP(2)    | C53-C54   | $\sigma^*$ | 23.72  | 0.28 | 0.072 |
| N96       | LP(1)    | N115-O117 | $\sigma^*$ | 1.97   | 0.18 | 0.019 |
| O117      | LP(2)    | C90-C91   | $\sigma^*$ | 0.51   | 0.33 | 0.012 |

LP= lone pair, (i) donor; (j) acceptor; E(2) means energy of hyper conjugative interaction (stabilization energy); E(j) - E(i) is the energy difference between donor and acceptor i and j NBO orbitals; F(i, j) is the Fock matrix element between i and j NBO orbitals.

**Table S12:** Natural bond orbital (NBO) analysis of investigated compound **MSTD3** by using M06 6-31G(d,p).

| Donor(i)      | Type  | Acceptor(j)   | Type    | E(2) <sup>a</sup> [kcal/mol] | E(J)E(i) <sup>b</sup> (a.u) | F(I,j) <sup>c</sup> (a.u) |
|---------------|-------|---------------|---------|------------------------------|-----------------------------|---------------------------|
| C 60 - C 61   | $\pi$ | C 83 - C 113  | $\pi^*$ | 27.99                        | 0.3                         | 0.083                     |
| C 33 - C 34   | $\pi$ | C 35 - N 52   | $\pi^*$ | 26.19                        | 0.26                        | 0.077                     |
| C 62 - C 63   | $\pi$ | C 60 - C 61   | $\pi^*$ | 24.75                        | 0.3                         | 0.078                     |
| C 83 - C 113  | $\pi$ | C 88 - C 89   | $\pi^*$ | 23.94                        | 0.29                        | 0.075                     |
| C 103 - C 104 | $\pi$ | C 107 - C 108 | $\pi^*$ | 22.82                        | 0.29                        | 0.074                     |
| C 78 - C 79   | $\pi$ | C 77 - C 82   | $\pi^*$ | 21.25                        | 0.31                        | 0.073                     |
| C 3 - C 4     | $\pi$ | C 1 - C 2     | $\pi^*$ | 20.75                        | 0.3                         | 0.073                     |
| C 105 - C 106 | $\pi$ | C 107 - C 108 | $\pi^*$ | 19.13                        | 0.29                        | 0.068                     |
| C 107 - C 108 | $\pi$ | C 103 - C 104 | $\pi^*$ | 18.17                        | 0.3                         | 0.067                     |

|               |          |               |            |        |      |       |
|---------------|----------|---------------|------------|--------|------|-------|
| C 26 - C 27   | $\pi$    | C 28 - C 29   | $\pi^*$    | 16.9   | 0.31 | 0.067 |
| C 37 - C 38   | $\pi$    | C 1 - C 2     | $\pi^*$    | 14.46  | 0.32 | 0.062 |
| C 68 - C 69   | $\pi$    | C 28 - C 29   | $\pi^*$    | 12.44  | 0.29 | 0.053 |
| C 36 - N 51   | $\pi$    | C 37 - C 38   | $\pi^*$    | 8.85   | 0.37 | 0.054 |
| N 115 - O 117 | $\pi$    | C 88 - C 89   | $\pi^*$    | 0.66   | 0.51 | 0.018 |
| S 50 - N 51   | $\sigma$ | C 36 - C 37   | $\sigma^*$ | 8.35   | 1.27 | 0.092 |
| C 3 -Si 40    | $\sigma$ | C 4 - S 10    | $\sigma^*$ | 7.95   | 0.72 | 0.068 |
| C 107 - C 108 | $\sigma$ | N 94 - C 106  | $\sigma^*$ | 6.38   | 1.16 | 0.077 |
| C 22 - H 24   | $\sigma$ | C 21 - S 25   | $\sigma^*$ | 5.28   | 0.74 | 0.056 |
| C 19 - C 20   | $\sigma$ | C 15 - C 20   | $\sigma^*$ | 4.87   | 1.25 | 0.07  |
| C 105 - C 106 | $\sigma$ | C 104 - C 105 | $\sigma^*$ | 3.61   | 1.28 | 0.061 |
| C 77 - C 86   | $\sigma$ | C 77 - C 82   | $\sigma^*$ | 2.99   | 1.27 | 0.055 |
| C 5 - C 6     | $\sigma$ | C 5 -Si 40    | $\sigma^*$ | 2.1    | 0.99 | 0.041 |
| C 3 - C 4     | $\sigma$ | C 3 -Si 40    | $\sigma^*$ | 2.08   | 0.99 | 0.041 |
| C 19 - C 20   | $\sigma$ | C 14 - C 15   | $\sigma^*$ | 2.04   | 1.31 | 0.046 |
| C 45 - H 46   | $\sigma$ | Si 40 - C 41  | $\sigma^*$ | 2.01   | 0.77 | 0.035 |
| C 77 - C 78   | $\sigma$ | C 78 - C 88   | $\sigma^*$ | 1.98   | 1.16 | 0.043 |
| C 89 - N 115  | $\sigma$ | C 88 - C 89   | $\sigma^*$ | 1.67   | 1.43 | 0.044 |
| C 60 - C 61   | $\sigma$ | C 61 - H 64   | $\sigma^*$ | 1.41   | 1.19 | 0.037 |
| C 27 - C 28   | $\sigma$ | C 27 - H 30   | $\sigma^*$ | 1.21   | 1.13 | 0.033 |
| C 70 - H 74   | $\sigma$ | C 70 - C 73   | $\sigma^*$ | 1.11   | 1.13 | 0.032 |
| C 45 - H 48   | $\sigma$ | Si 40 - C 45  | $\sigma^*$ | 0.52   | 0.77 | 0.018 |
| C 26 - C 27   | $\sigma$ | C 29 - S 32   | $\sigma^*$ | 0.51   | 0.95 | 0.02  |
| O 116         | LP (3)   | N 115 - O 117 | $\pi^*$    | 177.93 | 0.16 | 0.153 |
| S 25          | LP (2)   | C 19 - C 20   | $\pi^*$    | 22.93  | 0.29 | 0.072 |
| O 91          | LP (2)   | N 115 - O 117 | $\pi^*$    | 2.05   | 0.18 | 0.019 |
| O 117         | LP (2)   | C 88 - C 89   | $\pi^*$    | 0.55   | 0.33 | 0.013 |
| O 87          | LP (2)   | C 77 - C 86   | $\sigma^*$ | 21.89  | 0.75 | 0.116 |
| O 92          | LP (1)   | C 89 - N 90   | $\sigma^*$ | 4.37   | 1.13 | 0.064 |
| S 59          | LP (1)   | C 55 - C 56   | $\sigma^*$ | 2.01   | 1.25 | 0.045 |
| Cl 102        | LP (2)   | C 77 - C 82   | $\sigma^*$ | 0.51   | 0.93 | 0.02  |

LP= lone pair, (i) donor; (j) acceptor; E(2) means energy of hyper conjugative interaction (stabilization energy); E(j) - E(i) is the energy difference between donor and acceptor i and j NBO orbitals; F(i, j) is the Fock matrix element between i and j NBO orbitals.

**Table S13:** Natural bond orbital (NBO) analysis of investigated compound **MSTD4** by using M06 6-31G(d,p).

| Donor(i)  | Type  | Acceptor(j) | Type    | E(2) <sup>a</sup> [kcal/mol] | E(J)E(i) <sup>b</sup> (a.u) | F(I,j) <sup>c</sup> (a.u) |
|-----------|-------|-------------|---------|------------------------------|-----------------------------|---------------------------|
| C60-C61   | $\pi$ | C83-C116    | $\pi^*$ | 27.48                        | 0.3                         | 0.082                     |
| C62-C63   | $\pi$ | C60-C61     | $\pi^*$ | 24.48                        | 0.3                         | 0.078                     |
| C108-C109 | $\pi$ | C106-C107   | $\pi^*$ | 22.85                        | 0.29                        | 0.075                     |
| C3-C4     | $\pi$ | C1-C2       | $\pi^*$ | 20.71                        | 0.3                         | 0.072                     |
| C106-C107 | $\pi$ | C108-C109   | $\pi^*$ | 18.49                        | 0.29                        | 0.069                     |
| C19-C20   | $\pi$ | C21-C22     | $\pi^*$ | 17.08                        | 0.31                        | 0.067                     |



|           |          |         |            |       |      |       |
|-----------|----------|---------|------------|-------|------|-------|
| C7-C8     | $\pi$    | C5-C6   | $\pi^*$    | 16.54 | 0.3  | 0.066 |
| C26-C27   | $\pi$    | C21-C22 | $\pi^*$    | 15.03 | 0.31 | 0.063 |
| C37-C38   | $\pi$    | C1-C2   | $\pi^*$    | 14.42 | 0.32 | 0.061 |
| C19-C20   | $\pi$    | C14-C15 | $\pi^*$    | 12.27 | 0.32 | 0.059 |
| C28-C29   | $\pi$    | C68-C69 | $\pi^*$    | 10.81 | 0.32 | 0.055 |
| N89-O90   | $\pi$    | C87-C88 | $\pi^*$    | 3.74  | 0.49 | 0.041 |
| C87-C88   | $\pi$    | N92-O93 | $\pi^*$    | 3.25  | 0.18 | 0.024 |
| C87-C88   | $\pi$    | C87-C88 | $\pi^*$    | 0.52  | 0.33 | 0.012 |
| S50-N51   | $\sigma$ | C36-C37 | $\sigma^*$ | 8.34  | 1.27 | 0.092 |
| C116-H117 | $\sigma$ | C83-C85 | $\sigma^*$ | 6.75  | 1.01 | 0.074 |
| C61-H64   | $\sigma$ | C60-S66 | $\sigma^*$ | 5.21  | 0.73 | 0.055 |
| C36-C37   | $\sigma$ | C38-F67 | $\sigma^*$ | 4.99  | 0.99 | 0.063 |
| C11-H95   | $\sigma$ | C12-C13 | $\sigma^*$ | 4.19  | 1.1  | 0.061 |
| C97-H100  | $\sigma$ | C71-N96 | $\sigma^*$ | 4.11  | 0.99 | 0.057 |
| C83-C87   | $\sigma$ | C78-C79 | $\sigma^*$ | 3.99  | 1.26 | 0.064 |
| C2-C3     | $\sigma$ | C3-C4   | $\sigma^*$ | 3.69  | 1.25 | 0.061 |
| C63-S66   | $\sigma$ | C62-H65 | $\sigma^*$ | 3.44  | 1.13 | 0.056 |
| C68-C69   | $\sigma$ | C29-S32 | $\sigma^*$ | 3.12  | 0.91 | 0.048 |
| C27-C28   | $\sigma$ | C26-C27 | $\sigma^*$ | 2.82  | 1.28 | 0.054 |
| C61-C62   | $\sigma$ | C62-C63 | $\sigma^*$ | 2.68  | 1.27 | 0.052 |
| C1-C37    | $\sigma$ | C35-C36 | $\sigma^*$ | 1.98  | 1.2  | 0.044 |
| C36-N51   | $\sigma$ | C35-C36 | $\sigma^*$ | 1.69  | 1.38 | 0.043 |
| C29-C68   | $\sigma$ | C27-C28 | $\sigma^*$ | 1.42  | 1.26 | 0.038 |
| C70-H74   | $\sigma$ | C70-C73 | $\sigma^*$ | 1.11  | 1.13 | 0.032 |
| C83-C85   | $\sigma$ | C77-C85 | $\sigma^*$ | 0.61  | 1.15 | 0.024 |
| C1-C2     | $\sigma$ | C4-S10  | $\sigma^*$ | 0.5   | 0.95 | 0.02  |
| O94       | LP(3)    | N92-O93 | $\pi^*$    | 177.6 | 0.16 | 0.153 |
| S10       | LP(2)    | C1-C2   | $\pi^*$    | 20.45 | 0.28 | 0.068 |
| O90       | LP(2)    | N92-O93 | $\pi^*$    | 2.01  | 0.18 | 0.019 |
| O93       | LP(2)    | C87-C88 | $\pi^*$    | 0.52  | 0.33 | 0.012 |
| O86       | LP(2)    | C77-C85 | $\sigma^*$ | 21.76 | 0.75 | 0.116 |
| F67       | LP(2)    | C33-C38 | $\sigma^*$ | 6.92  | 1.01 | 0.075 |
| N96       | LP(1)    | C97-H98 | $\sigma^*$ | 2.03  | 0.68 | 0.037 |
| F67       | LP(1)    | C33-C38 | $\sigma^*$ | 0.5   | 1.6  | 0.025 |

LP= lone pair, (i) donor; (j) acceptor; E(2) means energy of hyper conjugative interaction (stabilization energy); E(j) - E(i) is the energy difference between donor and acceptor i and j NBO orbitals; F(i, j) is the Fock matrix element between i and j NBO orbitals.

**Table S14:** Natural bond orbital (NBO) analysis of investigated compound **MSTD5** by using M06 6-31G(d,p).

| Donor(i) | Type  | Acceptor(j) | Type    | E(2) <sup>a</sup> [kJ/mol] | E(J)E(i) <sup>b</sup> (a.u) | F(I,j) <sup>c</sup> (a.u) |
|----------|-------|-------------|---------|----------------------------|-----------------------------|---------------------------|
| C60-C61  | $\pi$ | C83-C116    | $\pi^*$ | 27.18                      | 0.3                         | 0.082                     |
| C33-C34  | $\pi$ | C35-N52     | $\pi^*$ | 26.11                      | 0.26                        | 0.077                     |
| C14-C15  | $\pi$ | C11-C16     | $\pi^*$ | 20.26                      | 0.3                         | 0.071                     |

|          |          |          |            |        |      |       |
|----------|----------|----------|------------|--------|------|-------|
| C5-C6    | $\pi$    | C7-C8    | $\pi^*$    | 17.93  | 0.31 | 0.068 |
| N89-O90  | $\pi$    | N89-O90  | $\pi^*$    | 7.43   | 0.35 | 0.055 |
| C87-C88  | $\pi$    | C83-C116 | $\pi^*$    | 6.69   | 0.35 | 0.044 |
| C83-C116 | $\pi$    | C87-C88  | $\pi^*$    | 6.69   | 0.35 | 0.044 |
| C87-C88  | $\pi$    | C87-C88  | $\pi^*$    | 0.58   | 0.33 | 0.013 |
| S50-N51  | $\sigma$ | C36-C37  | $\sigma^*$ | 8.34   | 1.27 | 0.092 |
| S50-N52  | $\sigma$ | C34-C35  | $\sigma^*$ | 8.3    | 1.28 | 0.092 |
| C5-Si40  | $\sigma$ | C6-S9    | $\sigma^*$ | 8.29   | 0.71 | 0.069 |
| C3-Si40  | $\sigma$ | C4-S10   | $\sigma^*$ | 7.95   | 0.72 | 0.068 |
| C61-H64  | $\sigma$ | C60-S66  | $\sigma^*$ | 5.21   | 0.73 | 0.055 |
| C14-C15  | $\sigma$ | C13-H101 | $\sigma^*$ | 2.23   | 1.15 | 0.045 |
| C34-C35  | $\sigma$ | C35-C36  | $\sigma^*$ | 2.21   | 1.2  | 0.046 |
| N96-C107 | $\sigma$ | C97-H99  | $\sigma^*$ | 0.52   | 1.21 | 0.023 |
| C1-S10   | $\sigma$ | C1-C2    | $\sigma^*$ | 0.51   | 1.23 | 0.022 |
| C6-S9    | $\sigma$ | C7-C8    | $\sigma^*$ | 0.51   | 1.27 | 0.023 |
| C21-C22  | $\sigma$ | C20-S25  | $\sigma^*$ | 0.51   | 0.94 | 0.02  |
| C26-C27  | $\sigma$ | C29-S32  | $\sigma^*$ | 0.51   | 0.94 | 0.02  |
| C41-H44  | $\sigma$ | Si40-C41 | $\sigma^*$ | 0.51   | 0.77 | 0.018 |
| C45-H47  | $\sigma$ | Si40-C45 | $\sigma^*$ | 0.51   | 0.77 | 0.018 |
| C1-C2    | $\sigma$ | C4-S10   | $\sigma^*$ | 0.5    | 0.95 | 0.02  |
| O94      | LP(3)    | N92-O93  | $\pi^*$    | 177.56 | 0.16 | 0.152 |
| O91      | LP(3)    | N89-O90  | $\pi^*$    | 163.78 | 0.16 | 0.149 |
| N96      | LP(1)    | C71-C76  | $\pi^*$    | 39.23  | 0.3  | 0.1   |
| S32      | LP(2)    | C28-C29  | $\pi^*$    | 23.18  | 0.29 | 0.073 |
| O90      | LP(2)    | C88-N89  | $\sigma^*$ | 14.35  | 0.61 | 0.084 |
| O94      | LP(2)    | C88-N92  | $\sigma^*$ | 14.32  | 0.57 | 0.081 |
| O91      | LP(2)    | C88-N89  | $\sigma^*$ | 13.8   | 0.61 | 0.082 |
| O90      | LP(2)    | C87-C88  | $\sigma^*$ | 0.59   | 0.91 | 0.021 |
| N51      | LP(1)    | C36-C37  | $\sigma^*$ | 0.58   | 0.97 | 0.021 |
| O93      | LP(2)    | C87-C88  | $\pi^*$    | 0.51   | 0.33 | 0.012 |

LP= lone pair, (i) donor; (j) acceptor; E(2) means energy of hyper conjugative interaction (stabilization energy); E(j) - E(i) is the energy difference between donor and acceptor i and j NBO orbitals; F(i, j) is the Fock matrix element between i and j NBO orbitals.

**Table S15:** Natural bond orbital (NBO) analysis of investigated compound **MSTD6** by using M06 6-31G(d,p).

| Donor(i) | Type  | Acceptor(j) | Type    | E(2) <sup>a</sup> [kJ/mol] | E(J)E(i) <sup>b</sup> (a.u) | F(I,j) <sup>c</sup> (a.u) |
|----------|-------|-------------|---------|----------------------------|-----------------------------|---------------------------|
| C60-C61  | $\pi$ | C83-C117    | $\pi^*$ | 30.34                      | 0.3                         | 0.085                     |
| C33-C34  | $\pi$ | C35-N52     | $\pi^*$ | 26.4                       | 0.26                        | 0.078                     |
| C62-C63  | $\pi$ | C60-C61     | $\pi^*$ | 26.16                      | 0.29                        | 0.08                      |
| C77-C82  | $\pi$ | C86-O87     | $\pi^*$ | 17.06                      | 0.3                         | 0.068                     |
| C60-C61  | $\pi$ | C62-C63     | $\pi^*$ | 17.05                      | 0.29                        | 0.063                     |

|           |          |           |            |        |      |       |
|-----------|----------|-----------|------------|--------|------|-------|
| C33-C34   | $\pi$    | C55-C56   | $\pi^*$    | 14.48  | 0.29 | 0.06  |
| C37-C38   | $\pi$    | C1-C2     | $\pi^*$    | 14.47  | 0.32 | 0.061 |
| C80-C81   | $\pi$    | N104-O106 | $\pi^*$    | 14.46  | 0.18 | 0.048 |
| C35-N52   | $\pi$    | C36-N51   | $\pi^*$    | 14.14  | 0.34 | 0.066 |
| C3-C4     | $\pi$    | C5-C6     | $\pi^*$    | 13.84  | 0.3  | 0.059 |
| C12-C13   | $\pi$    | C7-C8     | $\pi^*$    | 13.53  | 0.28 | 0.056 |
| C88-C89   | $\pi$    | N119-O121 | $\pi^*$    | 2.91   | 0.18 | 0.023 |
| C109-C110 | $\pi$    | C109-C110 | $\pi^*$    | 0.71   | 0.28 | 0.013 |
| N119-O121 | $\pi$    | C88-C89   | $\pi^*$    | 0.67   | 0.51 | 0.018 |
| C37-C38   | $\pi$    | C37-C38   | $\pi^*$    | 0.62   | 0.31 | 0.013 |
| C60-C61   | $\pi$    | C83-C117  | $\pi^*$    | 30.34  | 0.3  | 0.085 |
| S50-N51   | $\sigma$ | C36-C37   | $\sigma^*$ | 8.36   | 1.27 | 0.092 |
| C83-C86   | $\sigma$ | C77-C82   | $\sigma^*$ | 3.46   | 1.27 | 0.059 |
| C5-C6     | $\sigma$ | C5-C7     | $\sigma^*$ | 3.45   | 1.28 | 0.06  |
| C11-C16   | $\sigma$ | C11-C12   | $\sigma^*$ | 3.44   | 1.29 | 0.06  |
| C13-C14   | $\sigma$ | C14-C15   | $\sigma^*$ | 3.44   | 1.29 | 0.06  |
| C53-C54   | $\sigma$ | C56-H58   | $\sigma^*$ | 3.02   | 1.18 | 0.053 |
| C73-C76   | $\sigma$ | C70-C73   | $\sigma^*$ | 3.02   | 1.31 | 0.056 |
| C79-C80   | $\sigma$ | C78-C79   | $\sigma^*$ | 3.02   | 1.32 | 0.057 |
| C41-H42   | $\sigma$ | Si40-C45  | $\sigma^*$ | 2.02   | 0.77 | 0.035 |
| C83-C86   | $\sigma$ | C117-H118 | $\sigma^*$ | 2.02   | 1.09 | 0.042 |
| C68-C69   | $\sigma$ | C70-H74   | $\sigma^*$ | 1.99   | 1.15 | 0.043 |
| C21-C22   | $\sigma$ | C22-H24   | $\sigma^*$ | 1.53   | 1.18 | 0.038 |
| C26-C27   | $\sigma$ | C27-H30   | $\sigma^*$ | 1.53   | 1.18 | 0.038 |
| C6-S9     | $\sigma$ | C7-C8     | $\sigma^*$ | 0.51   | 1.27 | 0.023 |
| C21-C22   | $\sigma$ | C20-S25   | $\sigma^*$ | 0.51   | 0.94 | 0.02  |
| O93       | LP(2)    | C87-C88   | $\pi^*$    | 0.51   | 0.33 | 0.012 |
| O105      | LP(3)    | N104-O106 | $\pi^*$    | 186.34 | 0.17 | 0.16  |
| O102      | LP(3)    | N101-O103 | $\pi^*$    | 162.34 | 0.18 | 0.154 |
| N94       | LP(1)    | C71-C76   | $\pi^*$    | 39.28  | 0.3  | 0.1   |
| N94       | LP(1)    | C109-C110 | $\pi^*$    | 38.64  | 0.3  | 0.099 |
| O102      | LP(2)    | C81-N101  | $\sigma^*$ | 15.08  | 0.58 | 0.083 |
| F67       | LP(2)    | C37-C38   | $\sigma^*$ | 5.57   | 1.03 | 0.068 |
| O91       | LP(2)    | N119-O121 | $\pi^*$    | 2.01   | 0.18 | 0.019 |
| O102      | LP(3)    | N101-O103 | $\sigma^*$ | 0.53   | 0.71 | 0.02  |
| O106      | LP(2)    | C80-C81   | $\sigma^*$ | 0.53   | 0.85 | 0.019 |
| F67       | LP(1)    | C33-C38   | $\sigma^*$ | 0.5    | 1.61 | 0.025 |
| O120      | LP(3)    | N119-O120 | $\sigma^*$ | 0.5    | 0.72 | 0.02  |

LP= lone pair, (i) donor; (j) acceptor; E(2) means energy of hyper conjugative interaction (stabilization energy); E(j) - E(i) is the energy difference between donor and acceptor i and j NBO orbitals; F(i, j) is the Fock matrix element between i and j NBO orbitals.

**Table S16:** Natural bond orbital (NBO) analysis of investigated compound **MSTD67** by using M06 6-31G(d,p).

| Donor(i)  | Type     | Accepto(j) | Type       | E(2) <sup>a</sup> [kJ/mol] | E(J)E(i) <sup>b</sup> (a.u) | F(I,j) <sup>c</sup> (a.u) |
|-----------|----------|------------|------------|----------------------------|-----------------------------|---------------------------|
| C60-C61   | $\pi$    | C83-C118   | $\pi^*$    | 32.77                      | 0.3                         | 0.09                      |
| C80-C81   | $\pi$    | N103-O104  | $\pi^*$    | 29.68                      | 0.16                        | 0.065                     |
| C33-C34   | $\pi$    | C55-C56    | $\pi^*$    | 14.24                      | 0.3                         | 0.059                     |
| C35-N52   | $\pi$    | C36-N51    | $\pi^*$    | 14.17                      | 0.34                        | 0.066                     |
| C87-C88   | $\pi$    | C83-C118   | $\pi^*$    | 6.72                       | 0.35                        | 0.045                     |
| C85-O86   | $\pi$    | C77-C82    | $\pi^*$    | 4.05                       | 0.43                        | 0.04                      |
| C85-O86   | $\pi$    | C83-C118   | $\pi^*$    | 3.45                       | 0.43                        | 0.037                     |
| C87-C88   | $\pi$    | N89-O91    | $\pi^*$    | 1.37                       | 0.18                        | 0.016                     |
| C62-C63   | $\pi$    | C62-C63    | $\pi^*$    | 1.11                       | 0.29                        | 0.016                     |
| C35-N52   | $\pi$    | C35-N52    | $\pi^*$    | 0.92                       | 0.34                        | 0.017                     |
| C3-C4     | $\pi$    | C3-C4      | $\pi^*$    | 0.89                       | 0.29                        | 0.015                     |
| C71-C76   | $\pi$    | C71-C76    | $\pi^*$    | 0.73                       | 0.28                        | 0.013                     |
| C110-C111 | $\pi$    | C110-C111  | $\pi^*$    | 0.71                       | 0.28                        | 0.013                     |
| C37-C38   | $\pi$    | C37-C38    | $\pi^*$    | 0.67                       | 0.31                        | 0.013                     |
| C118-H119 | $\sigma$ | C60-S66    | $\sigma^*$ | 9.48                       | 0.73                        | 0.074                     |
| C5-C6     | $\sigma$ | C4-C6      | $\sigma^*$ | 5.12                       | 1.23                        | 0.071                     |
| C68-C70   | $\sigma$ | C68-C69    | $\sigma^*$ | 4.02                       | 1.28                        | 0.064                     |
| C69-C71   | $\sigma$ | N96-C111   | $\sigma^*$ | 1.99                       | 1.18                        | 0.043                     |
| C29-C68   | $\sigma$ | C69-C71    | $\sigma^*$ | 1.98                       | 1.29                        | 0.045                     |
| C68-C69   | $\sigma$ | C70-H74    | $\sigma^*$ | 1.98                       | 1.15                        | 0.043                     |
| C28-C29   | $\sigma$ | C68-C70    | $\sigma^*$ | 1.88                       | 1.3                         | 0.044                     |
| C77-C78   | $\sigma$ | C78-C87    | $\sigma^*$ | 1.87                       | 1.15                        | 0.041                     |
| C78-C87   | $\sigma$ | C77-C78    | $\sigma^*$ | 1.87                       | 1.24                        | 0.043                     |
| C2-H49    | $\sigma$ | C1-C2      | $\sigma^*$ | 1.86                       | 1.1                         | 0.041                     |
| C33-H39   | $\sigma$ | C38-F67    | $\sigma^*$ | 1.84                       | 0.83                        | 0.035                     |
| C77-C82   | $\sigma$ | C78-C87    | $\sigma^*$ | 1.84                       | 1.17                        | 0.041                     |
| C45-H47   | $\sigma$ | Si40-C45   | $\sigma^*$ | 0.51                       | 0.77                        | 0.018                     |
| C62-C63   | $\sigma$ | C60-S66    | $\sigma^*$ | 0.51                       | 0.93                        | 0.019                     |
| C26-C27   | $\sigma$ | C29-S32    | $\sigma^*$ | 0.50                       | 0.95                        | 0.019                     |
| O90       | LP(3)    | N89-O91    | $\pi^*$    | 179.75                     | 0.16                        | 0.154                     |
| O94       | LP(3)    | N92-O93    | $\pi^*$    | 164.15                     | 0.16                        | 0.15                      |
| N96       | LP(1)    | C71-C76    | $\pi^*$    | 39.2                       | 0.3                         | 0.1                       |
| O90       | LP(2)    | C88-N89    | $\sigma^*$ | 14.68                      | 0.58                        | 0.082                     |
| O94       | LP(3)    | C118-H119  | $\sigma^*$ | 2.11                       | 0.73                        | 0.04                      |
| O105      | LP(2)    | C80-H107   | $\sigma^*$ | 0.54                       | 0.75                        | 0.018                     |
| F67       | LP(1)    | C33-C38    | $\sigma^*$ | 0.50                       | 1.6                         | 0.025                     |

LP= lone pair, (i) donor; (j) acceptor; E(2) means energy of hyper conjugative interaction (stabilization energy); E(j) - E(i) is the energy difference between donor and acceptor i and j NBO orbitals; F(i, j) is the Fock matrix element between i and j NBO orbitals.

**Table S17:** Dipole polarizabilities and major contributing tensors (*esu*) of the studied compounds (DTS(FBTTh<sub>2</sub>)<sub>2</sub>R1 and D2- D7)

| Compounds                                | $\alpha_{xx} \times 10^{-22}$ | $\alpha_{yy} \times 10^{-22}$ | $\alpha_{zz} \times 10^{-22}$ | $\alpha\text{-total} \times 10^{-22}$ |
|------------------------------------------|-------------------------------|-------------------------------|-------------------------------|---------------------------------------|
| DTS(FBTTh <sub>2</sub> ) <sub>2</sub> R1 | 4.370                         | 1.509                         | 0.487                         | 2.123                                 |
| MSTD2                                    | 6.539                         | 2.041                         | 0.715                         | 3.098                                 |
| MSTD3                                    | 7.002                         | 2.114                         | 0.716                         | 3.277                                 |
| MSTD4                                    | 6.684                         | 1.938                         | 0.930                         | 3.184                                 |
| MSTD5                                    | 6.578                         | 1.888                         | 0.927                         | 3.131                                 |
| MSTD6                                    | 7.565                         | 2.153                         | 0.738                         | 3.485                                 |
| MSTD7                                    | 6.899                         | 2.101                         | 0.888                         | 3.296                                 |

**Table S18:** Dipole moment and major contributing tensors (*D*) of the studied compounds DTS(FBTTh<sub>2</sub>)<sub>2</sub>R1 and D2- D7)

| Compounds                                | $u_{xx}$ | $u_{yy}$ | $u_{zz}$  | $u\text{-total}$ |
|------------------------------------------|----------|----------|-----------|------------------|
| DTS(FBTTh <sub>2</sub> ) <sub>2</sub> R1 | 0.00     | 0.30     | -0.000039 | 0.30             |
| MSTD2                                    | -2.96    | 4.19     | -1.19     | 5.26             |
| MSTD3                                    | -4.79    | 3.80     | 0.35      | 6.13             |
| MSTD4                                    | 3.74     | 3.33     | 1.41      | 5.20             |
| MSTD5                                    | 3.44     | -3.51    | 0.004     | 4.92             |
| MSTD6                                    | -8.19    | 2.98     | 0.03      | 8.72             |
| MSTD7                                    | 5.50     | -2.99    | -1.27     | 6.39             |

**Table S19:** The computed hyper polarizabilities ( $\beta_{tot}$ ) and major contributing tensors (*esu*) of the studied compounds DTS(FBTTh<sub>2</sub>)<sub>2</sub>R1 and D2-D7)

| Systems         | DTS(FBTTh <sub>2</sub> ) <sub>2</sub> R1  | MSTD2                                     | MSTD3                                     | MSTD4                                     | MSTD5                                     | MSTD6                                     | MSTD7                                     |
|-----------------|-------------------------------------------|-------------------------------------------|-------------------------------------------|-------------------------------------------|-------------------------------------------|-------------------------------------------|-------------------------------------------|
| $\beta_{xxx}$   | $-5.287 \times 10^{-33}$                  | $-6.477 \times 10^{-27}$                  | $-8.373 \times 10^{-27}$                  | $-7.299 \times 10^{-27}$                  | $6.861 \times 10^{-27}$                   | $-1.287 \times 10^{-26}$                  | $1.00 \times 10^{-26}$                    |
| $\beta_{xxy}$   | $7.724 \times 10^{-30}$                   | $1.063 \times 10^{-27}$                   | $1.387 \times 10^{-27}$                   | $1.341 \times 10^{-27}$                   | $-1.241 \times 10^{-27}$                  | $2.048 \times 10^{-27}$                   | $-1.466 \times 10^{-27}$                  |
| $\beta_{xyy}$   | $1.689 \times 10^{-33}$                   | $-1.941 \times 10^{-28}$                  | $-2.406 \times 10^{-28}$                  | $-2.510 \times 10^{-28}$                  | $2.415 \times 10^{-28}$                   | $-4.021 \times 10^{-28}$                  | $2.654 \times 10^{-28}$                   |
| $\beta_{yyy}$   | $-1.668 \times 10^{-33}$                  | $3.971 \times 10^{-29}$                   | $5.429 \times 10^{-29}$                   | $6.05 \times 10^{-29}$                    | $-5.315 \times 10^{-29}$                  | $7.164 \times 10^{-29}$                   | $-6.046 \times 10^{-29}$                  |
| $\beta_{xxz}$   | $-1.403 \times 10^{-33}$                  | $1.025 \times 10^{-28}$                   | $3.522 \times 10^{-29}$                   | $-1.555 \times 10^{-28}$                  | $8.266 \times 10^{-29}$                   | $-5.178 \times 10^{-29}$                  | $1.813 \times 10^{-29}$                   |
| $\beta_{yyz}$   | $-1.193 \times 10^{-33}$                  | $3.237 \times 10^{-30}$                   | $7.309 \times 10^{-31}$                   | $-3.927 \times 10^{-30}$                  | $2.372 \times 10^{-30}$                   | $7.044 \times 10^{-31}$                   | $-1.483 \times 10^{-30}$                  |
| $\beta_{xzz}$   | $2.851 \times 10^{-36}$                   | $-4.473 \times 10^{-31}$                  | $2.550 \times 10^{-30}$                   | $-3.017 \times 10^{-30}$                  | $2.223 \times 10^{-31}$                   | $5.535 \times 10^{-31}$                   | $7.814 \times 10^{-30}$                   |
| $\beta_{yzz}$   | $8.388 \times 10^{-31}$                   | $1.239 \times 10^{-31}$                   | $-3.093 \times 10^{-31}$                  | $1.403 \times 10^{-30}$                   | $-5.82 \times 10^{-31}$                   | $-9.303 \times 10^{-31}$                  | $-5.895 \times 10^{-31}$                  |
| $\beta_{zzz}$   | $1.116 \times 10^{-34}$                   | $6.708 \times 10^{-31}$                   | $6.748 \times 10^{-31}$                   | $7.772 \times 10^{-31}$                   | $-1.01 \times 10^{-30}$                   | $-5.115 \times 10^{-31}$                  | $-8.630 \times 10^{-31}$                  |
| $\beta_{total}$ | <b><math>8.118 \times 10^{-30}</math></b> | <b><math>6.763 \times 10^{-27}</math></b> | <b><math>8.730 \times 10^{-27}</math></b> | <b><math>7.684 \times 10^{-27}</math></b> | <b><math>7.221 \times 10^{-27}</math></b> | <b><math>1.344 \times 10^{-26}</math></b> | <b><math>1.039 \times 10^{-26}</math></b> |

**Table S20:** Second hyperpolarizability and major contributing tensor (*a.u.*) of the studied comp. DTS(FBTTh<sub>2</sub>)<sub>2</sub>R1 and D2- D7)

| Compounds                                | $\gamma_x$              | $\gamma_y$              | $\gamma_z$              | $\langle \gamma \rangle$ |
|------------------------------------------|-------------------------|-------------------------|-------------------------|--------------------------|
| DTS(FBTTh <sub>2</sub> ) <sub>2</sub> R1 | $0.396 \times 10^{-31}$ | $0.632 \times 10^{-33}$ | $0.386 \times 10^{-35}$ | $0.403 \times 10^{-31}$  |
| MSTD2                                    | $1.42 \times 10^{-31}$  | $3.40 \times 10^{-33}$  | $4.35 \times 10^{-35}$  | $1.45 \times 10^{-31}$   |
| MSTD3                                    | $1.97 \times 10^{-31}$  | $4.48 \times 10^{-33}$  | $1.73 \times 10^{-35}$  | $2.02 \times 10^{-31}$   |
| MSTD4                                    | $1.66 \times 10^{-31}$  | $4.67 \times 10^{-33}$  | $11.1 \times 10^{-35}$  | $1.71 \times 10^{-31}$   |
| MSTD5                                    | $1.52 \times 10^{-31}$  | $4.31 \times 10^{-33}$  | $5.93 \times 10^{-35}$  | $1.57 \times 10^{-31}$   |
| MSTD6                                    | $3.59 \times 10^{-31}$  | $7.22 \times 10^{-33}$  | $2.64 \times 10^{-35}$  | $3.66 \times 10^{-31}$   |
| MSTD7                                    | $2.61 \times 10^{-31}$  | $6.21 \times 10^{-33}$  | $10.4 \times 10^{-35}$  | $2.67 \times 10^{-31}$   |

$$(\beta_x)^2 = (\beta_{xxx} + \beta_{xyy} + \beta_{xzz})^2 \quad \text{Eq S1}$$

$$(\beta_y)^2 = (\beta_{yyy} + \beta_{yzz} + \beta_{yxx})^2 \quad \text{Eq S2}$$

$$(\beta_z)^2 = (\beta_{zzz} + \beta_{zxx} + \beta_{zyz})^2 \quad \text{Eq S3}$$

**Table S21:** Wave length, excitation energy and oscillator strength of investigated reference compound **DTS(FBTTh<sub>2</sub>)<sub>2</sub>R1**

| NO | DFT<br>$\lambda$ (nm) | E (eV) | $f$   | MO contributions                                     |
|----|-----------------------|--------|-------|------------------------------------------------------|
| 1  | 711.408               | 1.743  | 2.092 | H→L (94%), H-1→L+1 (5%)                              |
| 2  | 607.855               | 2.040  | 0.086 | H→L+1 (92%), H-1→L (6%)                              |
| 3  | 522.831               | 2.371  | 0.044 | H-1→L (88%), H-2→L+1 (6%), H→L+1 (5%)                |
| 4  | 477.046               | 2.599  | 0.064 | H-2→L (17%), H-1→L+1 (78%), H→L (3%)                 |
| 5  | 439.754               | 2.819  | 0.087 | H-2→L (71%), H-1→L+1 (14%), H-3→L+1 (3%), H→L+2 (9%) |
| 6  | 431.099               | 2.876  | 0.727 | H→L+2 (84%), H-2→L (7%), H-1→L+3 (2%)                |

**Table S22:** Wave length, excitation energy and oscillator strength of investigated compound **MSTD2**

| No. | DFT<br>$\lambda$ (nm) | E (eV) | $f_{os}$ | MO contributions                                                                          |
|-----|-----------------------|--------|----------|-------------------------------------------------------------------------------------------|
| 1   | 810.190               | 1.530  | 1.589    | H→L (83%) H-1→L (8%), H→L+1 (5%)                                                          |
| 2   | 656.970               | 1.887  | 0.869    | H-1→L (40%), H→L (16%), H→L+1 (28%) H-3→L (5%), H-1→L+1 (6%)                              |
| 3   | 627.891               | 1.975  | 0.113    | H-1→L (41%), H→L+1 (49%) H-1→L+1 (4%)                                                     |
| 4   | 546.543               | 2.269  | 0.205    | H-3→L (73%) H-4→L (7%), H-1→L (9%)                                                        |
| 5   | 521.333               | 2.378  | 0.029    | H→L+2 (52%), H→L+3 (25%) H-3→L (5%), H-3→L+2 (2%), H-1→L+2 (6%), H-1→L+3 (3%), H→L+1 (3%) |
| 6   | 519.454               | 2.387  | 0.008    | H-1→L+1 (68%), H→L+1 (11%) H-3→L+1 (6%), H→L+2 (7%)                                       |

MO=molecular orbital, HOMO=H, LUMO=L,  $f$ = oscillator strength

**Table S23:** Wave length, excitation energy and oscillator strength of investigated compound **MSTD3**

| No. | DFT<br>$\lambda$ (nm) | E (eV) | $f_{os}$ | MO contributions                                                                        |
|-----|-----------------------|--------|----------|-----------------------------------------------------------------------------------------|
| 1   | 859.563               | 1.442  | 1.396    | H→L (87%) H-1→L (7%), H→L+1 (3%)                                                        |
| 2   | 688.835               | 1.800  | 0.873    | H-1→L (59%), H→L (13%), H→L+1 (15%) H-3→L (6%), H-1→L+1 (4%)                            |
| 3   | 651.447               | 1.903  | 0.353    | H-1→L (26%), H→L+1 (61%) H-1→L+1 (6%), H→L+3 (3%)                                       |
| 4   | 568.131               | 2.182  | 0.232    | H-3→L (69%) H-4→L (8%), H-1→L (8%), H→L+1 (4%), H→L+2 (4%)                              |
| 5   | 545.413               | 2.273  | 0.000    | H-2→L (94%) H→L+2 (3%)                                                                  |
| 6   | 543.596               | 2.281  | 0.007    | H→L+2 (38%), H→L+3 (28%) H-3→L (9%), H-2→L (5%), H-1→L+2 (4%), H-1→L+3 (4%), H→L+1 (7%) |

MO=molecular orbital, HOMO=H, LUMO=L,  $f$ = oscillator strength

**Table S24:** Wave length, excitation energy and oscillator strength of investigated compound **MSTD4**

| No. | DFT<br>$\lambda$ (nm) | E (eV) | $f_{os}$ | MO contributions                                                               |
|-----|-----------------------|--------|----------|--------------------------------------------------------------------------------|
| 1   | 833.726               | 1.487  | 1.479    | H→L (85%) H-1→L (8%), H→L+1 (4%)                                               |
| 2   | 672.069               | 1.845  | 0.915    | H-1→L (48%), H→L (14%), H→L+1 (22%) H-3→L (5%),<br>H-1→L+1 (5%)                |
| 3   | 639.815               | 1.938  | 0.188    | H-1→L (35%), H→L+1 (54%) H-1→L+1 (4%), H→L+3 (2%)                              |
| 4   | 556.478               | 2.228  | 0.223    | H-3→L (69%) H-4→L (8%), H-1→L (9%), H→L+1 (3%),<br>H→L+2 (3%)                  |
| 5   | 534.572               | 2.319  | 0.013    | H→L+2 (38%), H→L+3 (31%) H-3→L (8%), H-1→L+2 (5%),<br>H-1→L+3 (4%), H→L+1 (7%) |
| 6   | 530.819               | 2.336  | 0.001    | H-2→L (98%)                                                                    |

**Table S25:** Wave length, excitation energy and oscillator strength of investigated compound **MSTD5**

| No. | DFT<br>$\lambda$ (nm) | E (eV) | $f_{os}$ | MO contributions                                                                |
|-----|-----------------------|--------|----------|---------------------------------------------------------------------------------|
| 1   | 818.264               | 1.515  | 1.592    | H→L (84%) H-1→L (8%), H→L+1 (4%)                                                |
| 2   | 660.540               | 1.877  | 0.917    | H-1→L (36%), H→L (15%), H→L+1 (32%) H-3→L (5%), H-<br>1→L+1 (6%)                |
| 3   | 631.601               | 1.963  | 0.070    | H-1→L (46%), H→L+1 (45%) H-3→L (2%), H-1→L+1 (3%)                               |
| 4   | 548.405               | 2.260  | 0.205    | H-3→L (65%), H-1→L (10%) H-4→L (7%), H→L+1 (3%),<br>H→L+2 (6%)                  |
| 5   | 531.296               | 2.337  | 0.036    | H-3→L (12%), H→L+2 (44%), H→L+3 (26%) H-1→L+2<br>(5%), H-1→L+3 (3%), H→L+1 (5%) |
| 6   | 522.673               | 2.372  | 0.018    | H-1→L+1 (67%) H-3→L+1 (7%), H→L+1 (9%), H→L+2 (9%)                              |

**Table S26:** Wave length, excitation energy and oscillator strength of investigated compound **MSTD6**

| No. | DFT<br>$\lambda$ (nm) | E (eV) | $f_{os}$ | MO contributions                                                                               |
|-----|-----------------------|--------|----------|------------------------------------------------------------------------------------------------|
| 1   | 982.747               | 1.262  | 0.841    | H→L (92%) H-1→L (5%)                                                                           |
| 2   | 780.997               | 1.588  | 1.228    | H-1→L (27%), H→L+1 (52%) H-1→L+1 (6%), H→L (6%),<br>H→L+2 (4%)                                 |
| 3   | 760.074               | 1.631  | 0.024    | H-1→L (61%), H→L+1 (32%) H-3→L (2%)                                                            |
| 4   | 637.348               | 1.945  | 0.717    | H-3→L (10%), H-1→L+1 (29%), H→L+1 (12%), H→L+2<br>(30%) H-3→L+1 (3%), H-1→L (4%), H-1→L+2 (7%) |
| 5   | 617.816               | 2.007  | 0.035    | H-3→L (31%), H-1→L+1 (44%) H-4→L (5%), H-2→L (2%),<br>H-1→L (2%), H→L+2 (8%)                   |
| 6   | 609.494               | 2.034  | 0.003    | H-2→L (97%)                                                                                    |

MO=molecular orbital, HOMO=H, LUMO=L,  $f$ = oscillator strength

**Table S27:** Wave length, excitation energy and oscillator strength of investigated compound **MSTD7**

| No. | DFT<br>$\lambda$ (nm) | E (eV) | $f_{os}$ | MO contributions                                              |
|-----|-----------------------|--------|----------|---------------------------------------------------------------|
| 1   | 930.247               | 1.333  | 1.009    | H→L (91%) H-1→L (5%)                                          |
| 2   | 732.243               | 1.693  | 0.704    | H-1→L (75%) H-3→L (6%), H-1→L+1 (2%), H→L (8%),<br>H→L+1 (7%) |
| 3   | 676.617               | 1.832  | 0.801    | H-1→L (14%), H→L+1 (71%) H-1→L+1 (8%), H→L+3 (3%)             |

|   |         |       |       |                                                                                               |
|---|---------|-------|-------|-----------------------------------------------------------------------------------------------|
| 4 | 596.791 | 2.078 | 0.140 | H-3→L (77%) H-4→L (8%), H-1→L (6%), H→L+1 (4%)                                                |
| 5 | 580.881 | 2.134 | 0.002 | H-2→L (98%)                                                                                   |
| 6 | 546.351 | 2.269 | 0.035 | H-1→L+1 (34%), H→L+1 (15%), H→L+3 (29%) H-3→L (2%),<br>H-3→L+1 (2%), H-1→L+3 (6%), H→L+2 (9%) |

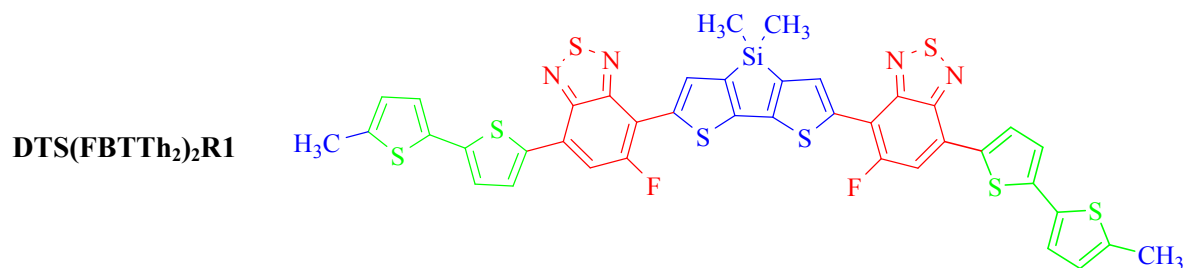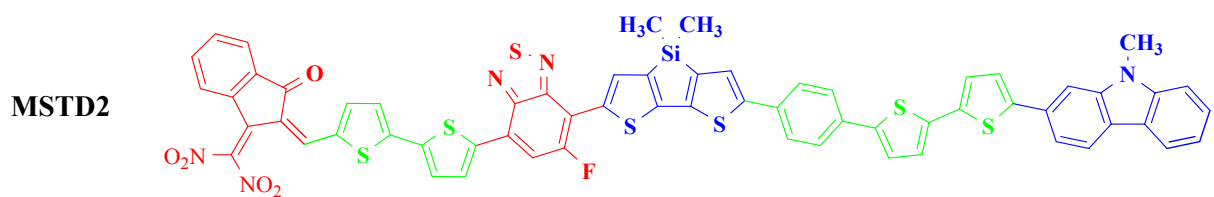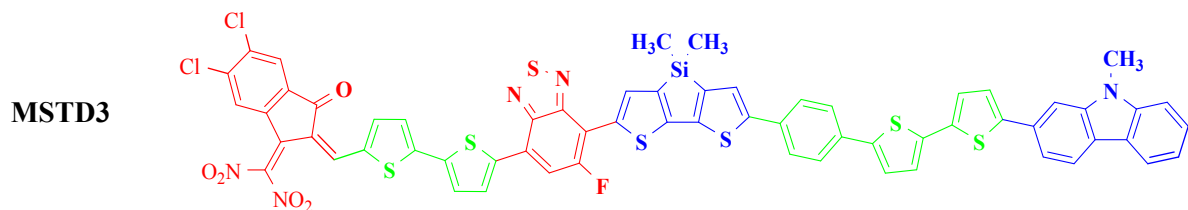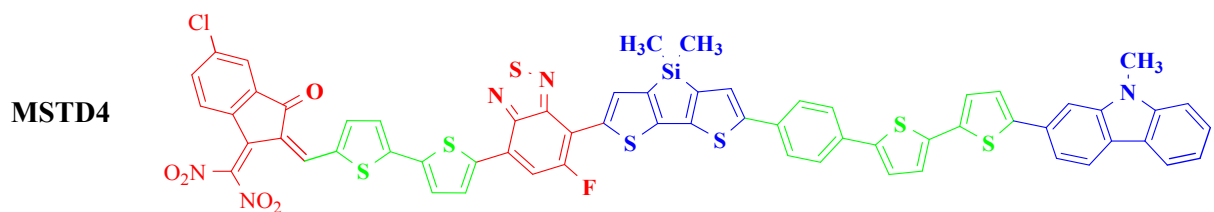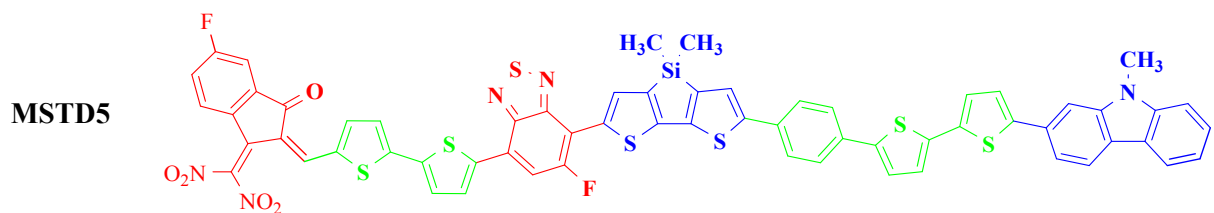



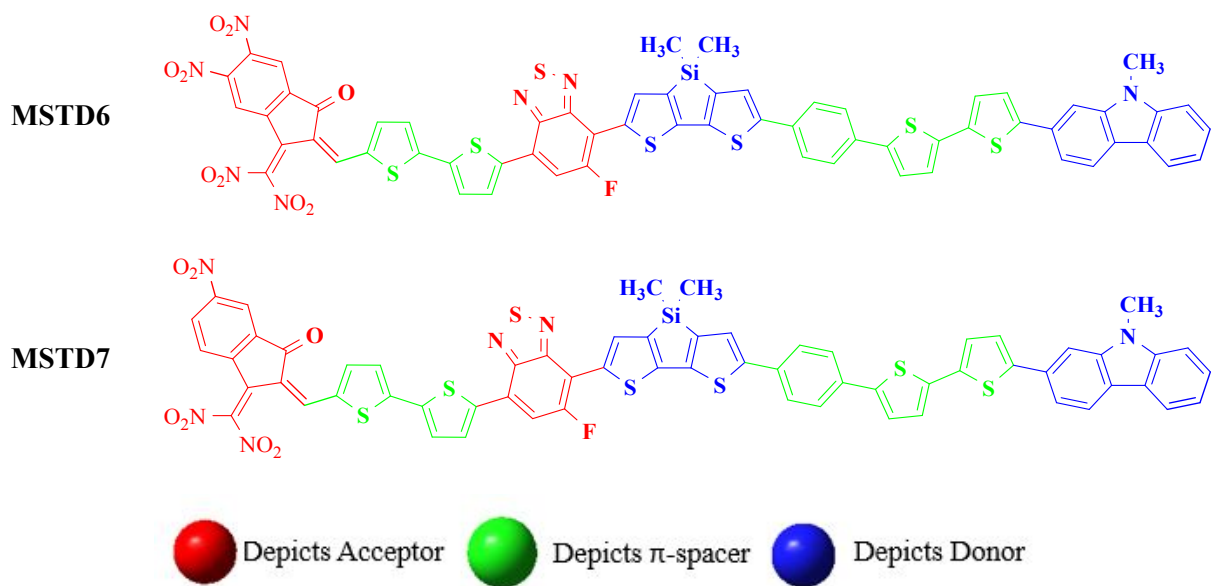

**Figure S1:** The structures of DTS(FBTTh<sub>2</sub>)<sub>2</sub>R1 and its derivatives

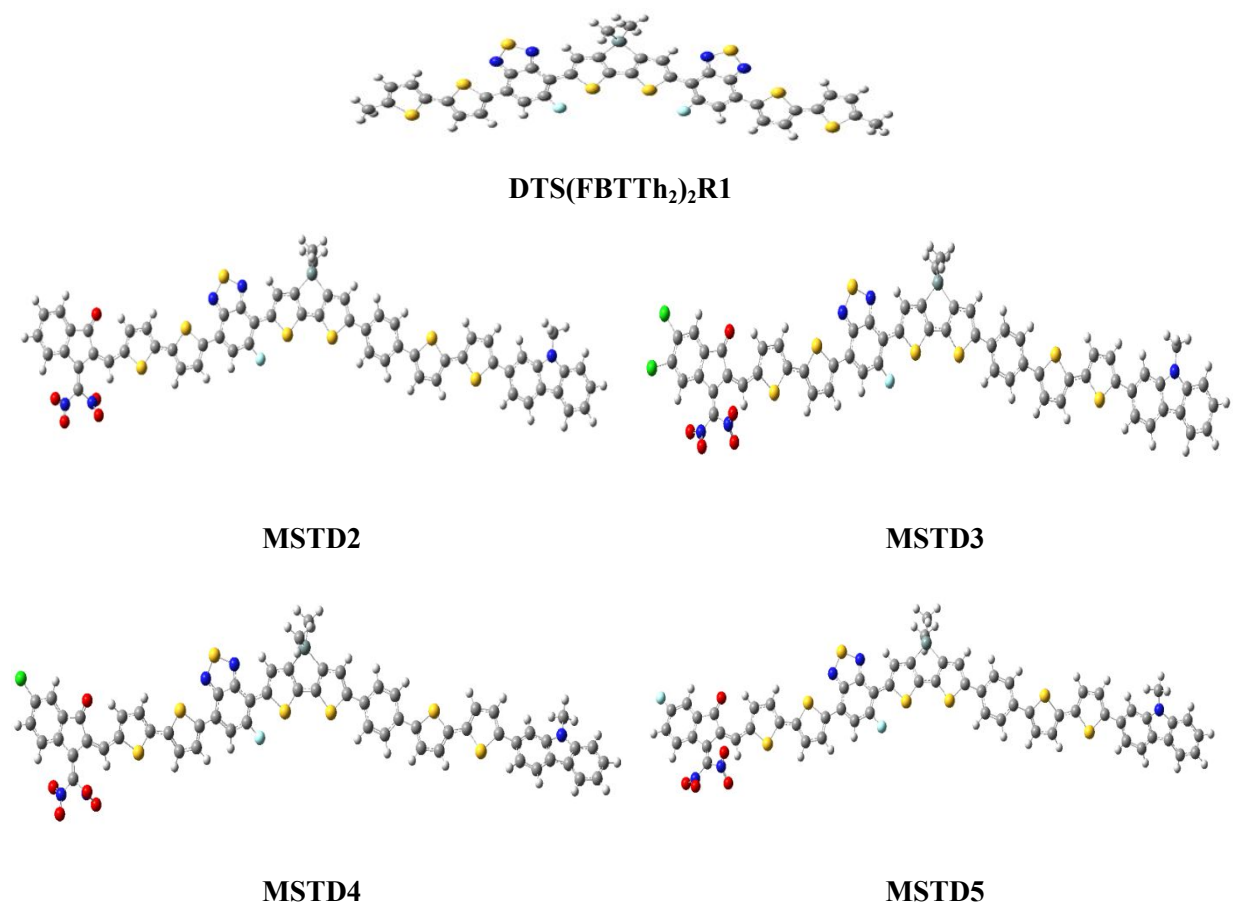

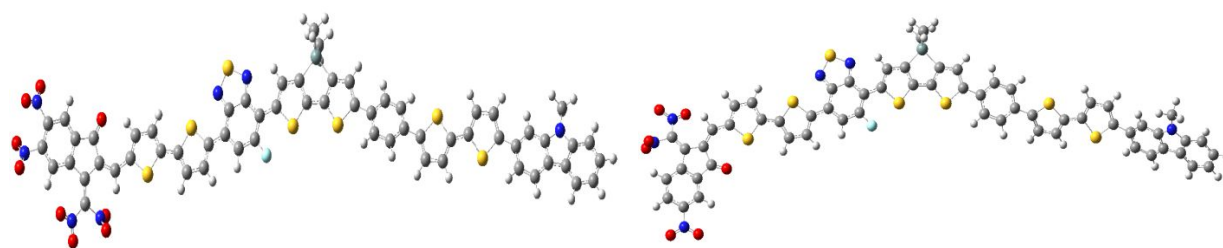

**MSTD6**

**MSTD7**

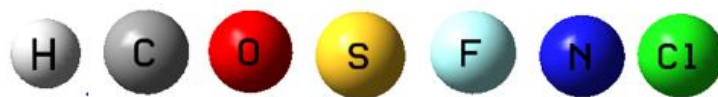

**Figure S2:** The optimized structures of **DTS(FBTTh<sub>2</sub>)<sub>2</sub>R1** and its derivatives
